# Supplementary material
Source: publisher figshare collection journal article supplement (https://tandf.figshare.com/ndownloader/files/18016589)
Supplement: Supplementary file 1 [file 18016589]

## DEVELOPMENT OF A DATABASE OF KEY CHARACTERISTICS OF HUMAN CARCINOGENS

### Supplemental Material I: Toxicological Endpoints Expressed by Six Group-1 Agents

Mustafa Al-Zoughool<sup>1,2</sup>, Michael Bird<sup>1</sup>, Jerry Rice<sup>3</sup>, Robert A. Baan<sup>4</sup>, Méliissa Billard<sup>1</sup>,  
Nicholas Birkett<sup>5</sup>, Daniel Krewski<sup>1,5,6</sup> and Jan M Zielinski<sup>1,5,+</sup>

<sup>1</sup>McLaughlin Centre for Population Health Risk Assessment, University of Ottawa, Ottawa, Canada

<sup>2</sup>Department of Community and Environmental Health, King Saud bin Abdulaziz University for Health Sciences, Riyadh, Saudi Arabia

<sup>3</sup>Department of Oncology, Georgetown University Medical Center, Georgetown University, Washington, USA

<sup>4</sup>International Agency for Research on Cancer (retired), Lyon France

<sup>5</sup>School of Epidemiology and Public Health, University of Ottawa, Ottawa, Ontario, Canada

<sup>6</sup>Risk Sciences International, Ottawa, Canada

<sup>+</sup>Deceased

The key characteristics of the 86 Group-1 agents considered by Birkett et al. (2019) were determined based on the corresponding toxicological endpoints expressed by those agents, by use of the mapping of these endpoints to the key characteristics given in Table 2. The determination of key characteristics for the six agents summarized in Table 3 is described in detail below.

References in the main text below were drawn from the *Monographs* themselves and from relevant literature published around the time of their publication. In the ‘Updated PubMed search’, more recent studies are cited to support the identification of TEs and the ensuing KCs. In some cases, this search revealed information that led to novel TE/KC assignments. Details on the numbering of the 24 TEs and their categorization in terms of the ten KCs are given elsewhere in this Annex (Tables 1–2).

### **Tamoxifen (IARC, 2012a)**

Tamoxifen induces DNA damage (TE#1). DNA adducts were detected in some studies in endometrial tissue and in leukocytes of breast-cancer patients treated with tamoxifen (Hemminki et al., 1996; Shibutani et al., 1999; Umemoto et al., 2004). DNA adducts were also found in animals in vivo (Davies et al., 1997; Tryndyak et al., 2006; Gamboa da Costa et al., 2007) as well as in vitro in mammalian cells (Glatt et al., 1998). Tamoxifen induced DNA double-strand breaks and oxidized purines and pyrimidines via formation of free radicals (TE#2) in human peripheral blood lymphocytes and in human MCF-7 breast cancer cells (Wozniak et al., 2007). Clastogenic effects (TE#4) of tamoxifen were shown as formation of micronuclei in human lymphoblastoid MCL-5 cells (Styles et al., 1997), and of chromosome aberrations and micronuclei in vivo in mouse bone marrow (Vijayalaxmi & Rai, 1996; Hirsimäki et al., 2002) and in rat liver (Styles et al., 1997). Tamoxifen also induced endometrial *K-RAS* mutations (TE#5) in postmenopausal breast cancer patients (Wallén et al., 2005), and it reduced p53 protein levels in MCF-7 human breast adenocarcinoma cells (Guillot et al., 1996). Tamoxifen also acts through epigenetic mechanisms (TE#6). Methylation of cell-free plasma DNA of breast cancer patients was altered after treatment with the agent (Liggett et al., 2011). Treatment of human endometrial cell cultures with tamoxifen resulted in changes in expression of genes associated with transcription regulation, cell-cycle control and signal transduction (Pole et al., 2005). In endometrial epithelial cells,

the gene PAX2 is crucially involved in cell proliferation and endometrial carcinogenesis; this gene is activated by tamoxifen via hypo-methylation of its promoter (Wu et al., 2005b). Long-term exposure of rats to tamoxifen induced histone modifications (Tryndyak et al., 2006) and led to substantial changes in expression of microRNA genes in the liver (Pogribny et al., 2007).

Tamoxifen is an anti-estrogen that acts, at least in part, by competing with estrogen receptors (TE#17). It is thus effective in arresting the growth of estrogen-responsive tumour cells. However, tamoxifen also inhibited the growth of MDA-MB-435 human breast cancer cells (Charlier et al., 1995) and of A549 human lung adenocarcinoma cells (Croxtall et al., 1994), which are both ER-negative. Apparently, ER-independent mechanisms are operative here (Reddel et al., 1985; Naundorf et al., 1996).

Tamoxifen induced an imbalance between cell proliferation (TE#15) and apoptosis (TE#13), as was shown in benign endometrial tissue from tamoxifen-treated breast cancer patients (Mourits et al., 2002). Estrogen modulators – including tamoxifen – affected transduction of cellular signalling pathways that govern cell growth and proliferation, through downstream effectors such as PAX2 (Shang, 2006). Tamoxifen reduced cell proliferation (TE#15) in human MCF-7 and MDA-MB-231 breast carcinoma cells, and induced changes in the expression of individual telomerase components (TE#20), which correlated with telomerase activity and cell proliferation (Aldous et al., 1999). Tamoxifen inhibited the growth of human MCF-7 breast cancer cells, as well as the expression of telomerase reverse transcriptase (hTERT), but it stimulated the growth and activated hTERT mRNA expression in human endometrial carcinoma cells. These effects of tamoxifen are mediated by transcriptional regulation of the hTERT promoter (Wang et al., 2002a). The tamoxifen-induced decrease of telomerase activity in human HepG2 hepatoblastoma cells was shown to be mediated by post-translational suppression of protein kinase C activity (Brandt et al., 2005).

### **Updated PubMed search**

Tamoxifen induces oxidative stress (TE#2). In cells derived from the human retinal pigment epithelium and from the mouse retinal photoreceptor, tamoxifen-induced cell death was accompanied by increased oxidative stress and elevated zinc levels; this effect was attenuated by the antioxidant *N*-acetyl-L-cysteine (Cho et al., 2012). Rats treated with tamoxifen showed an increase in aminotransferases, carbonyl groups and 8-oxo-dG, all markers of oxidative stress (Codoñer-Franch et al., 2013). Tamoxifen caused autophagic cell death of human glioma cells in vitro through induction of oxidative stress, JNK activation, and up/downregulation of pro/anti-autophagic members of the BCL2 family (Harmalkar et al., 2015). Tamoxifen induced a significant reduction in fat mass in adipose mice and transiently stimulated the production of reactive oxygen species (ROS) in these mice, and in murine adipocytes exposed to tamoxifen in vitro (Liu et al., 2015). The growth-inhibitory effects of tamoxifen on MCF7 human breast cancer cells were associated with enhanced levels of ROS production and lipid peroxidation (Sajadimajd et al., 2016).

### **Hepatitis B virus (IARC, 2012b)**

Hepatitis B virus (HBV) induces chronic necro-inflammatory hepatic diseases (cirrhosis, chronic hepatitis) characterized by necrosis of hepatocytes followed by regenerative cell proliferation. These disorders induce oxidative/nitrosative stress and lipid peroxidation (LPO), thereby generating excess reactive oxygen species (ROS), reactive nitrogen species (RNS), and DNA-reactive aldehydes. The DNA adduct (TE#2) etheno-deoxyadenosine – resulting from interaction with LPO-generated aldehydes – was excreted in urine of HBV-infected patients diagnosed with chronic hepatitis, cirrhosis and hepatocellular carcinoma (Bartsch & Nair, 2004; Bartsch & Nair, 2006). The HBV-encoded X protein (HBx) increased the level of mitochondrial reactive oxygen species (TE#2) and caused lipid peroxide production in human liver cells (Lee et al., 2004). In human HepAD38 hepatoma cells in vitro, HBV replication induced oxidative stress and caused upregulation of heat-shock proteins and of genes (TE#7) associated with oxidative and metabolic stress, cell growth, and apoptosis (Severi et al., 2006).

Oxidative stress and oxidative DNA damage were also observed in hepatocytes of transgenic mice overexpressing the HBV large envelope protein (Hagen et al., 1994) or the HBx protein (Gehrke et al., 2004). The HBx protein modulates DNA-repair processes (TE#16) by interacting with p53 and/or repair enzymes, which may accumulate mutations (TE#5) and sensitize cells to genotoxic stimuli (Murakami, 1999). In transfection experiments with human HepG2 hepatoma cells, this protein was also found to trans-activate the *c-MYC* proto-oncogene at the transcriptional level (Balsano et al., 1991).

HBV infection causes clastogenic/cytogenetic effects (TE#4). Analysis of hepatocellular carcinoma (HCC) tissue showed that integration of HBV DNA caused secondary chromosomal rearrangements, such as translocations, inversions, deletions and (possibly) amplifications (Matsubara & Tokino 1990). Chromosome abnormalities were detected in peripheral blood cells of HBV chronic carriers (Simon et al., 1991). Increased frequencies of chromosomal alterations and micronuclei were found in human hepatoma HepG2 cells transfected with the HBX gene (Livezey et al., 2002), as well as in HBV carriers and HBV patients (Leite et al., 2014). HBV-transfected HepG2T14.1 cells (variant of the HepG2 cell line) showed several genetic alterations such as de-novo aberrations of chromosomes 9, 14, 15, and 20, as well as loss of heterozygosity (LOH) in the q region of chromosome 14. In HBV chronic carriers and HBV-positive patients with cirrhosis, the frequency of sister chromatid exchange (SCE) was significantly higher than in the controls (Ucur et al., 2003).

HBV also acts via epigenetic mechanisms (TE#6). HCC tissue samples showed higher methylation frequencies in several genes, e.g. APC, GSTP1, Cox-2, than did samples from non-HCC liver tissue (Lee et al., 2003; Oh et al., 2007; Su et al., 2007). In human HepG2 and Huh7 hepatoma cells in vitro, HBV replication induced methylation of both host and viral DNA (Vivekanandan et al., 2010). The HBx protein promoted regional hyper-methylation and global hypo-methylation in cultured human liver cells (Park et al., 2007), and in HCC cells (Jung et al., 2010). Differential microRNA expression was observed in liver tissue obtained from 12 patients with HBV-related HCC; analysis of targeted genes by use of these infection-associated miRNAs revealed that pathways related to cell death, DNA damage, recombination, and signal transduction were activated in HBV-infected liver (Ura et al., 2009). Deregulation of miRNA was an early event and accumulated throughout the various steps of HBV-associated hepatocarcinogenesis, with miRNA-145 being a candidate tumour-suppressive miRNA with an important role in HCC development (Gao et al., 2011). Similar effects of differential miRNA expression during acute and chronic infection were found in HBV-transfected HepG2 cells (Zhang et al., 2011). HBV replication in human HuH7 hepatoma cells and in liver tissue from HBV-infected patients was shown to be regulated by the acetylation status of the H3/H4 histones bound to the HBV mini-chromosome (Pollicino et al., 2006).

HBV also induces changes in gene expression (TE#7). In HCC tissues/cell lines, HBV was found to be integrated into hepatocellular genomic DNA and shown to encode transcriptional trans-activators that stimulate gene expression from homologous and heterologous promoters (Schlüter et al., 1994). HBV-DNA integration sites isolated from HCC tissue showed that the viral genome induced mutations in key regulatory cellular genes (TE#5) (Paterlini-Bréchet et al., 2003). Integration of the HBV X DNA fragment and changes in gene expression were also seen in archival HCC specimens obtained from patients with HBV infection (Peng et al., 2005). In HepG2 cells, transfection with HBx induced expression of key genes involved in modulating signal-transduction pathways (Cougot et al., 2007).

HBV induces changes in cell signalling (TE#8). In HepG2 and HuH7 human hepatoma cells, the HBx protein, encoded by the HBX gene, induced cytoplasmic retention of the p53 protein (Takada et al., 1997). This same protein also induced expression of key factors involved in complex signal-transduction pathways for transactivation, through interaction with binding sites for transcription factors AP-1, AP-2, and NF-kappa B (Kekulé et al., 1993). The HBx protein induced expression of genes encoding metastasis-associated protein 1 and histone deacetylase in HCC, and in the liver of HBx-transgenic mice (Yoo et al., 2008).



different mechanisms (Wang et al., 2002a). In cultured human HeLa S3 cells, arsenite and its methylated metabolites induced high levels of oxidative DNA damage (TE#2) (Schwerdtle et al., 2003). Sodium arsenite in drinking-water caused oxidative stress in liver, brain and erythrocytes of rats (Flora 1999).

Arsenic also induces cytogenetic damage (TE#4). Increased frequencies of chromosomal aberrations and sister chromatid exchange were observed in humans exposed to inorganic arsenic in drinking-water (Mahata et al., 2004). Chromosomal aberrations (Oya-Ohta et al., 1996) and micronuclei (Yih & Lee 1999) were found in human fibroblasts exposed to arsenicals in vitro. Arsenic also induced formation of micronuclei, in bone marrow of exposed mice (Deknadt et al., 1986; Lewińska et al., 2007). In vitro, it induced micronucleus formation in Chinese hamster V79 lung fibroblasts (Sinha et al., 2005). The mono- and dimethylated metabolites of trivalent arsenic were clastogenic (TE#4) in human lymphocytes and mutagenic (TE#5) in mouse lymphoma cells in vitro, but were negative for gene mutation in three strains of *Salmonella typhimurium* in the plate-incorporation assay (Kligerman et al., 2003). In the *Drosophila melanogaster* wing somatic mutation and recombination test (SMART) – which measures loss of heterozygosity resulting from gene mutation, chromosome rearrangement, breakage, and loss – the organic arsenic compound dimethylarsinic acid (DMAV) increased the frequency of mutant spots; inorganic arsenic was inactive in this assay (Rizki et al., 2006). Arsenite acted as a co-mutagen at the hypoxanthine-guanine phosphoribosyl-transferase (Hprt) locus in Chinese hamster V79 lung fibroblasts irradiated with UV light of three different wavelengths (Li & Rossman 1991). In-vitro treatment of Chinese hamster cells with sodium arsenite caused genetic instability (micronucleated, multinucleated, and apoptotic cells) (TE#16), aneuploidy, and persistent genome-wide hypomethylation (TE#6) (Sciandrello et al., 2002; Sciandrello et al., 2004).

Arsenic-induced carcinogenesis may proceed through epigenetic mechanisms (TE#6). The promoter regions of the genes TP53 and CDKN2A (encoding the tumour-suppressor protein p16) were hypermethylated in people chronically exposed to arsenic and in subjects with arsenic-related skin cancer (Chanda et al., 2006). Arsenic also induced specific alterations in histone H3 methylation in human A549 lung carcinoma cells (Zhou et al., 2008). As mentioned above, genome-wide hypomethylation was observed in V79-CI3 Chinese hamster cells treated with arsenite (Sciandrello et al., 2004). Arsenic also induced changes in histone H3 acetylation and DNA methylation in human urothelial cell lines (Jensen et al., 2008) and alterations in cellular micro-RNA expression profiles in human lymphoblastoid cells (Marsit et al., 2006).

Arsenite induced amplification (TE#7) of the dihydrofolate reductase (*Dhfr*) gene in 3T6 mouse embryo fibroblasts, which became methotrexate-resistant (Lee et al., 1988), and also amplified DHFR in human osteosarcoma TE85 (HOS) cells (Mure et al., 2003).

Arsenic may induce altered cell signalling (TE#8), especially at low doses. Treatment of human keratinocytes and fibroblasts with 0.1–1 microM arsenic increased transcription, protein levels and enzyme activity of several base-excision repair genes, including DNA polymerase beta and DNA ligase I. However, at higher concentrations (> 10 microM), arsenic induced downregulation of DNA repair, oxidative DNA damage and apoptosis (Snow et al., 2005).

Developmental stage-dependent susceptibility (TE#10) to the effects of arsenic was studied in newborns whose mothers experienced varying levels of arsenic exposure during pregnancy. Gene-expression profiling identified 11 activated transcripts associated with activation of molecular networks involving NF-kappaB, stress, inflammation (TE#12), cell proliferation, and apoptosis in the newborn (Fry et al., 2007).

Arsenic induced oxidant stress and NF-kappa B activation in cultured aortic porcine endothelial cells, with superoxide and hydrogen peroxide being the predominant reactive species that stimulate cell signalling and activate transcription factors (Barchowsky et al., 1996; Barchowsky et al., 1999). Long-term, low-dose exposure to arsenic induced a generalized resistance to apoptosis in cultured HaCaT human keratinocytes, which then became tolerant toward high doses of arsenic, UVA radiation, and a number of chemotherapeutics (Pi et al., 2005). Pretreatment of human keratinocytes with sodium

arsenite in vitro decreased the pro-apoptotic effects (TE#13) induced by UVB (Chen et al., 2005). Sodium arsenite inhibited apoptosis induced by UVR (solar-simulation ultraviolet radiation) in mouse keratinocytes (Wu et al., 2005b).

Arsenic interferes with cell proliferation and differentiation (TE#15), as evidenced by stimulation of keratinocyte-derived growth factors in primary human epidermal keratinocytes (Germolec et al., 1997), by an increase in cyclin D1 in normal human fibroblasts (Vogt & Rossman 2001), as well as by K-RAS oncogene overexpression and hypomethylation of genomic DNA in prostatic epithelial cells (Benbrahim-Tallaa et al., 2005a). Increased proliferation of the bladder epithelium was observed in mice exposed to arsenite in drinking-water (Luster & Simeonova, 2004). Cell proliferation was also induced in animal cells (Trouba et al., 2000) and in human cells (Komissarova et al., 2005) treated with arsenic in vitro.

Arsenic also interferes with cellular DNA repair (Hartwig & Schwerdtle 2002) (TE#16). Exposure to trivalent mono-methyl arsenic strongly inhibited DNA repair in normal human primary fibroblasts by reducing TP53 induction after exposure to a carcinogen (Shen et al., 2008) or by inhibition of poly(ADP-ribosyl)ation in cultured human HeLa S3 cells (Walter et al., 2007). These studies also indicated that inhibition of DNA repair by arsenic contributed to genomic instability. Sodium arsenite was co-mutagenic with N-methyl-N-nitrosourea (MMU) at the *Hprt* locus in V79 Chinese hamster lung fibroblasts, probably by inhibiting proper repair of MNU-induced DNA lesions or by interfering with DNA-ligase activity (Li & Rossman 1989).

Arsenic exhibits receptor-mediated effects (TE#17). Chronic exposure to arsenic induced androgen independence in human prostate epithelial cells. This malignant transformation led to a sixfold increase in the expression of the *K-RAS* oncogene (Benbrahim-Tallaa et al., 2005b; Benbrahim-Tallaa et al., 2007). Arsenite and arsenate activated extracellular signal-regulated kinases 1/2 by an epidermal growth factor receptor-mediated pathway in normal human keratinocytes (Tanaka-Kagawa et al., 2003). Arsenic is a potent endocrine disruptor, altering gene regulation by the closely related steroid hormone receptors for glucocorticoids (GRs), mineralocorticoids (MRs), progesterone (PR), and androgen (AR) in a similar manner (Davey et al., 2007).

Angiogenic effects (TE#19) of arsenic were demonstrated in the chick chorioallantoic membrane (CAM) model: exposure to sodium arsenite (33 nM) caused a twofold increase in blood vessel branching (Mousa et al., 2007). In mice, low levels of arsenic (50–500 ppb in drinking-water) stimulated inflammatory angiogenesis and blood-vessel remodeling in the liver (Straub et al., 2007; States et al., 2009).

As evidence for immortalization (TE#23), sodium arsenite and sodium arsenate induced neoplastic transformation in normal, diploid Syrian hamster embryo (SHE) cells (Takahashi et al., 2002). Inorganic arsenite induced malignant transformation of human prostate epithelial cells (Achanzar et al., 2002).

### **Updated PubMed search**

Arsenic induced chromosomal aberrations and micronuclei (TE#4) in bone-marrow cells of rats (Patlolla et al., 2012), and erythrocytes of mice (Khan et al., 2013). Arsenic trioxide and sodium arsenite inhibited growth and induced death of P3HR1 lymphoblastoid cells: arsenite induced caspase-dependent apoptosis (TE#13) whereas arsenic trioxide triggered autophagic cell death (Zebboudj et al., 2014). Upon acute or chronic exposure to arsenite, human bronchial epithelial cells overexpressed the cytokines IL-6 and IL-8, which were essential for the progression of the arsenite-induced transformation of these cells. These data reveal a link between inflammation (TE#12) and malignant transformation (TE#23) in cells chronically exposed to arsenite (Xu et al., 2013b). In acute promyelocytic NB4 leukaemia cells, arsenic trioxide caused an increase in the expression (TE#7) of CDKN1B (encoding the p27 cyclin-dependent kinase inhibitor) and CDKN2A (encoding protein p16), and a reduction in the expression (TE#7) of hTERT (telomerase reverse transcriptase) (Yaghmaie et al., 2012).

## UV and Solar Radiation (IARC, 2012d)

Ultraviolet (UV) light is a genotoxic agent (TE#1) (Griffiths et al., 1998). UV radiation and visible light (290–500nm) induced DNA damage (TE#1) in cultured AS52 Chinese hamster ovary (CHO) cells (Kielbassa et al., 1997). Radiation in the UVA region (315–400nm) is only weakly absorbed by DNA, and induction of DNA damage occurs largely via photosensitizers that absorb UVA and release reactive oxygen/nitrogen species (ROS/RNS) that mediate DNA-damage induction (Ridley et al., 2009). Exposure of sea-urchin embryos to UVB (290–320nm) resulted in significant DNA damage measured as cyclobutane pyrimidine dimers (CPD), followed by a cascade of cellular events, and eventually apoptosis (Lesser et al., 2003). UVA (320–340nm) induced formation of single-strand breaks, oxidized pyrimidines, oxidized purines (essentially 8-oxo-7,8-dihydroguanine), and CPDs (largely TT-dimers) in CHO cells (Douki et al., 2003), and DNA strand-breaks in human HaCaT skin keratinocytes (Didier et al., 1999). UVA induced formation of reactive oxygen species (TE#2) in human keratinocytes, in particular after replacement of cholesterol with the more rapidly oxidized dehydrocholesterol (Valencia et al., 2006). Oxidative lesions in DNA were found in human skin fibroblasts and keratinocytes exposed to UVA radiation (Courdavault et al., 2004; Mouret et al., 2006), although CPDs predominated.

UV radiation causes cytogenetic effects (TE#4). UVB (302nm) induced chromatid breaks in primary human lymphocytes in vitro (Wang et al., 2005). UVB (310–315nm) induced DNA strand-breaks in JB6 mouse epidermal cells; addition of various antioxidant enzymes revealed that this DNA breakage is at least in part mediated by the formation of hydrogen peroxide and possibly other reactive species (Ghosh et al., 1993). In cultured CHO cells, 254-nm low-intensity continuous wave UV light strongly enhanced the level of sister chromatic exchange (SCE) (Rasmussen et al., 1989). UVA radiation (330–400nm) caused DNA strand-breaks and chromosomal aberrations in human HaCaT cells (Wischermann et al., 2008).

UV and solar radiation are capable of inducing gene mutation (TE#5) (Pfeifer et al., 2005). In skin tumours from Xeroderma pigmentosum (XP) patients, all mutations in the TP53 gene were targeted at bi-pyrimidine (py-py) sequences, 55% of which were tandem CC→TT transitions, which are considered to be a signature of exposure to UV (Dumaz et al., 1994). Likewise, nearly all the melanomas from XP patients who carried mutations in the PTEN tumour-suppressor gene had several UV-associated mutations, occurring at adjacent pyrimidines (Wang et al., 2009). Fingerprint mutations for UVA (AT > GC transversions) and UVB (GC > AT transitions) at py-py sites were analysed in the TP53 gene in human skin squamous cell carcinoma (SCC) and solar keratosis (SK) samples. These two mutation types occurred in nearly equal numbers, with UVA fingerprints largely distributed in the basal layer and UVB-induced mutations mainly in the supra-basal region (Agar et al., 2004). Clones of TP53-mutated cells were present in normal human and murine epidermis exposed to UVB, with sunlight acting as a tumour promoter by favouring the clonal expansion of TP53-mutated cells (Wikonkal & Brash 1999). Half of the skin tumours induced in hairless SKH/HR1 mice by daily exposure to long-wave UVA (365nm) showed positive staining for the p53 protein, and about 15% of the tumours showed a mutation in one of the exons 5, 7, or 8 of the p53 gene; no UVA-specific mutations, i.e. mutations specific for reactive oxygen species, were detected (van Kranen et al., 1997). Similarly, UV-signature mutations in the p53 tumour-suppressor gene are normally found in squamous cell carcinoma of experimental animal models (Rass & Reichrath 2008). When human 293-GTI-K embryonic kidney cells, which carry the lacZ bacterial gene on a stable shuttle vector, were irradiated with UVA or UVB, similar frequencies of LacZ mutations were seen at > 10% cell survival, whereas UVA induced twice as many mutations as did UVB at < 10% survival; mutations at A/T base pairs were induced more frequently by UVA than by UVB (Robert et al., 1996). In a series of human skin tumours, over 90% of squamous cell carcinomas and more than 50% of basal cell carcinomas contained UV-like mutations in the TP53 tumour suppressor gene. The DNA lesions were pyrimidine-cytosine photoproducts caused by the UVB component of sunlight. Particular codons of the TP53 gene are most susceptible, apparently because of slower DNA repair at specific sites (Brash et al., 1996).

Continuous UV radiation at 254 nm was mutagenic in CHO cells at the ouabain resistance locus *Oua* and at the *Hgp* gene locus (Rasmussen et al., 1989). UVA-induced CPDs were found predominantly at T-T dipyrimidines and correlated with the mutation spectrum (C→T and CC→TT transitions) in CHO cells (Rochette et al., 2003).

UV radiation can give rise to epigenetic changes (TE#6). UV radiation induced DNA hypermethylation and histone hypo-acetylation in human SCC cells in vivo and in SKH-1 hairless mice in vivo (Nandakumar et al., 2011). Aberrant methylation of tumour-suppressor gene promoters associated with transcriptional downregulation was shown in UV-induced human skin tumours such as basal cell carcinoma (BCC), squamous cell carcinoma (SCC), melanoma, and cutaneous lymphoma (van Doorn et al., 2005). UV radiation induced histone modifications in human skin fibroblasts in vitro (Kim et al., 2009a) and in the skin of hairless mice (Kim et al., 2013). Differential microRNA expression profiles have been described in NIH3T3 mouse embryo fibroblasts (Guo et al., 2009b) and in human keratinocytes (Zhou et al., 2012) in response to irradiation with UVB.

UV radiation also induces changes in gene expression (TE#7) in human cells in vivo (Rochette et al., 2009) as well as in vitro (Koch-Paiz et al., 2004; He et al., 2006). In human skin fibroblasts, repeated non-cytotoxic UVB exposures induced premature senescence, with loss of replicative potential and overexpression of senescence-associated genes (Chen et al., 2008). UV radiation induced prostaglandin E2 production and COX-2 expression in human skin in vivo (Seo et al., 2003), indicating that it can interfere with cell-signalling pathways (TE#8).

Genotype susceptibility (TE#10) to UV-induced skin cancer has been reported in vivo in human melanoma skin cancers: following exposure to UVB, methylated cytosines were significantly more susceptible to CPD formation than unmethylated cytosines (Rochette et al., 2009; 19 427 505). UV-induced changes in tyrosine cell signalling in melanocytes, keratinocytes, and fibroblasts from both human and murine sources were dependent on the characteristic genotypes of the cells exposed: UVR induced the receptor tyrosine kinase EphA2 by a p53-independent, but MAPK-dependent, mechanism (Zhang et al., 2008). Young adult BALB/c mice were more susceptible to the induction of skin tumours from FS40 sunlamps (emitting mainly UVB) than were 18-month-old animals (Ebbesen & Kripke 1982). Exposure to high levels of sunlight in childhood is a strong determinant of melanoma risk, which indicates developmental stage susceptibility to UV-induced cancers (Whiteman et al., 2001).

UV induces immunosuppression and immunomodulation (TE#11) in exposed humans. Solar-simulated UV caused significant immunosuppression in human volunteers, but equivalent doses of UVB and UVA did not, when given independently (Damian et al., 2008). However, interactions between UVA and UVB augment each other, enabling immunosuppression to occur at doses too low for either waveband to be suppressive (Halliday & Rana 2008). UVB radiation can alter the secretion of cytokines by epidermal keratinocytes and dermal fibroblasts (Fujisawa et al., 1997). These alterations have been implicated in UVB-induced immunosuppression and UVB-induced carcinogenesis (Eberlein-König et al., 1998; Suzuki et al., 2001).

In mice, chronic irradiation with UV produced a systemic change in the immune defence (TE#11), which resulted in the failure of the UV-irradiated mice to reject highly antigenic, transplanted UV-induced tumours that are rejected by non-irradiated syngeneic recipients (Fisher & Kripke, 1977; Fisher & Kripke, 2002). A photo-reactivating enzyme that is activated by visible light and repairs UV-induced CPD in DNA is present in marsupials, such as the opossum. UVB irradiation of the dorsal skin prevented these animals from developing a contact-hypersensitivity (CHS) response to dinitrofluorobenzene (DNFB). This effect was largely abolished when photo-reactivating light was given before the challenge with DNFB, which demonstrates the role of the pyrimidine dimer in this process (Applegate et al., 1989).

Exposure to UV induced apoptosis (TE#13) in human HaCaT keratinocytes. Conditioned medium collected 12 hours after UV exposure induced apoptosis in non-irradiated cells, and this effect increased progressively when conditioned medium collected 24 or 72 hours after UV exposure was



used (Banerjee et al., 2005). Exposure to UV of different human melanoma cell lines initiated progressive cell death associated with pronounced apoptosis, with UVA having a greater effect than UVB. Microsatellite instability was higher after UVB than after UVA (Hussein et al., 2005). While CPDs are the most important apoptosis-inducing UV-associated lesions in repair-proficient cells, recent data indicate that (6–4)-photoproducts act as a signal for apoptosis in human fibroblasts deficient in DNA repair (Batista et al., 2009). The receptor tyrosine kinase EPHA2 is an essential mediator in UV-induced apoptosis (Zhang et al., 2008).

UV can cause genomic instability (TE#16). UVA and UVB radiation induced persistent genomic instability in human cells in vitro (Phillipson et al., 2002; Hussein et al., 2005). UV radiation can also induce changes in vascularization (TE#19) in intrinsically aged and photo-aged human skin (Chung & Eun, 2007).

UVA can induce site-specific DNA-damage in telomere sequences (TE#20) in human fibroblasts and HL-60 leukaemia cells in vitro. A photo-excited endogenous photosensitizer was shown to oxidize the central guanine of 5'-GGG-3' in the telomere sequence to produce 8-oxodG, probably through an electron-transfer reaction. This site-specific damage may participate in the increase in the rate of telomere shortening (Oikawa et al., 2001b).

A bystander effect is defined as the induction of damage in non-irradiated cells by irradiated cells. UV radiation induced bystander signalling (TE#22) in human HaCaT keratinocytes and MRC5 fibroblasts in vitro (Banerjee et al., 2005; Whiteside & McMillan, 2009) and in V79 Chinese hamster fibroblasts in vitro (Dahle et al., 2005).

Repeated in-vitro exposures to UVA induced malignant transformation (TE#23) of human HaCaT cells, with acquired resistance to apoptosis induced not only by UVA but also by UVB, arsenite, and various other chemicals. Increased protein kinase B signalling and decreased expression of the tumour-suppressor PTEN may contribute to this malignant transformation (He et al., 2006). Multiple doses of combined UVA+UVB induced malignant transformation (TE#23) of human HaCaT keratinocytes (Gupta et al., 2006; Han et al., 2015).

### **Updated PubMed search**

In vivo, sun-exposed skin of three whale species showed breaks and other lesions in mitochondrial DNA (Bowman et al., 2013). DNA breakage (measured by use of the comet assay) (TE#1) also appeared in peripheral lymphocytes of rats exposed to natural sunlight (Rodrigues-Junior et al., 2012). Increased frequencies of micronucleated erythrocytes (TE#4) were found in newborns of rat dams exposed to UVA during pregnancy (Zúñiga-González et al., 2015). The role of microRNAs (TE#6) in the dermal response to UV radiation has recently been reviewed (Syed et al., 2013; Syed et al., 2015). Mutations in the promoter of the telomerase reverse transcriptase (TERT) gene (TE#20) are common in melanoma, basal cell carcinoma and squamous cell carcinoma (Horn et al., 2013; Huang et al., 2013; Scott et al., 2014).

### **Tobacco Smoking (IARC, 2012e)**

Tobacco smoke is a genotoxic and mutagenic mixture of thousands of chemicals (Hecht 1999; Hecht 2003; DeMarini 2004), some of which form adducts with DNA (TE#1) (Bartsch et al., 1993; Hang, 2010). In a pooled analysis of three prospective studies, an association was found between DNA-adduct levels and lung cancer risk, which was more obvious in current smokers. Likewise, in a meta-analysis of nine case-control studies, a significant association was found between lung or bladder cancer and the levels of bulky DNA adducts in current smokers (Veglia et al., 2008). Adducts have also been detected in animals exposed in vivo – whole-body or nose-only – to tobacco smoke (Bond et al., 1989; Gairola et al., 1991; Husgafvel-Pursiainen 2004). Other types of tobacco smoke-induced DNA damage included strand breaks (Nakayama et al., 1985; Holz et al., 1993) and oxidative lesions (TE#2), which have been found in a variety of tissues, including sperm, in smokers (DeMarini 2004) and in animals exposed in vivo (Husgafvel-Pursiainen 2004).

Smokers were shown to have significantly higher levels of sister chromatid exchange (SCE) (TE#1) in peripheral lymphocytes than non-smokers (Lambert et al., 1982; Perera et al., 1987; Sardaş et al., 1991). In some studies SCE formation in animals in vivo was reported, e.g. in bone-marrow cells of exposed mice (Benedict et al., 1984) and in fetal liver cells of mice exposed transplacentally (Karube et al., 1989), but in other reports SCE levels were not increased.

Tobacco smoke induces oxidative stress (TE#2) which results in oxidative damage to DNA and chronic inflammation (TE#12). This was supported by results of studies in humans in vivo or in human cells in vitro (Faux et al., 2009; Yanbaeva et al., 2007; Milara & Cortijo 2012), in laboratory experiments (Bhalla et al., 2009) and in animals in vivo (Verschuere et al., 2012).

Adducts between haemoglobin and different components of tobacco smoke (TE#3) were detected in the blood of smokers in a number of studies (Törnqvist et al., 1986; Bryant et al., 1987; Atawodi et al., 1998; von Stedingk et al., 2011). Protein adducts were also found in human alveolar basal epithelial A549 adenocarcinoma cells exposed in vitro to cigarette smoke (Rainey et al., 2009).

Tobacco smoke and several of its components cause cytogenetic damage (TE#4). Increased frequencies of micronuclei (Larramendy & Knuutila, 1991; Piyathilake et al., 1995) and chromosomal aberrations (CA) (Littlefield & Joiner 1986) were associated with tobacco smoking and with smokeless tobacco use ('chewing') in humans (Husgafvel-Pursiainen 2004). Buccal cells from smokers and 'chewers' display many of the changes associated with these two types of tobacco consumption (Proia et al., 2006). Cigarette-smoke condensate induced cytogenetic effects in vitro, in human diploid 2BS cells (Gu 1990), in human diploid GM03349B fibroblasts (Luo et al., 2004), and in animal cells and bacteria (DeMarini et al., 2008). SCE and CA were increased in human lymphocytes treated in vitro with the tobacco-specific nitrosamine, 4-(methylnitrosamino)-1-(3-pyridyl)-1-butanone (NNK) (Salama et al., 1999).

In lung adenocarcinomas from 92 smokers and 14 non-smokers, mutations (TE#5) in the oncogene *K-RAS* were detected in 40 tumours, all from smokers (Ahrendt et al., 2001). Mutations in *TP53* were found in smoking-associated cancers in smokers (Husgafvel-Pursiainen et al., 1995; Pfeifer et al., 2002). Activated *K-Ras* genes were detected in mouse lung tumours induced by NNK (Reynolds & Anderson 1991). Mutations at the *HPRT* locus were found in peripheral T-lymphocytes of smokers (Hackman et al., 2000). Both active and passive exposure to tobacco smoke in utero resulted in increased mutation at the *HPRT* locus in the fetus (Grant 2005).

Tobacco smoke also operates via epigenetic mechanisms (TE#6). Lung cells from smokers were shown to carry promoter methylations of critical genes such as *CDKN2A* (encoding protein p16) and *FHIT* (fragile histidine triad) (Belinsky et al., 2002; Kim et al., 2004; Belinsky, 2005; Bhutani et al., 2008). Studies of human cells exposed to cigarette-smoke condensate in vitro also reported histone alterations, genomic hypomethylation and local DNA hypermethylation (Liu et al., 2010). Epigenetic alterations in tumour suppressor genes, particularly methylation of *CDKN2A*, may be an important mechanism for *K-RAS*-related tumorigenesis, but one that is rarely involved in the *EGFR*-related pathway (Toyooka et al., 2006). Epigenetic transcriptional silencing (TE#6) of genes via CpG-island hypermethylation has become known as a critical component in the initiation and progression of lung cancer (Belinsky 2005). In the rat, nearly all adenocarcinomas induced by the tobacco-specific carcinogen NNK were hypermethylated at the *CDKN2A* promoter (Belinsky et al., 1998). In human squamous cell carcinomas (SCC), the p16-encoding gene *CDKN2A* was methylated in 75% of adjacent carcinoma-*in-situ* lesions. Moreover, in premalignant lesions obtained from persons without SCC, the methylation frequency of this gene increased from 17% in basal cell hyperplasia, to 24% in squamous cell metaplasia, to 50% in carcinoma in situ (Belinsky et al., 1998).

Changes in protein expression (TE#7) were observed in bronchial brush specimens from heavy smokers, where NNK enhanced the synthesis of the protein survivin in epithelial cells (Jin et al., 2008). Similar changes were reported for the Akt protein in human airway epithelial cells exposed to NNK in

vitro (West et al., 2003), and for the Fhit protein in rodents exposed to environmental cigarette smoke in vivo (D'Agostini et al., 2006).

Key pathways altered in human lung adenocarcinoma (TE#8) correlated with smoking status (Ding et al., 2008). Analysis of transcriptional profiles resulting from exposure to complex mixtures such as cigarette smoke demonstrated changes in transcription of numerous genes in human cells in vitro (Sen et al., 2007).

The genetic constitution of female smokers, in particular the *N*-acetyltransferase 2 (NAT2) slow-acetylation genotype (TE#10) enhances their risk for smoking-associated breast cancer (Ambrosone et al., 2008), but this genotype does not clearly influence the bacterial mutagenicity of smokers' urine (Hirvonen et al., 1994; Pavanello et al., 2002). In-vitro genotoxicity studies with human cells revealed evidence of genotype-carcinogen interactions, e.g. those associated with glutathione S-transferases M1 and T1 (Norppa 2003).

Tobacco smoke has been shown to affect the immune system, in particular early immune function (TE#11). Total leukocyte counts, most prominently segmented neutrophils, lymphocytes, and myeloid precursor dendritic cells, were reduced in neonates of smoking mothers compared with controls. These effects reflect an impact of maternal smoking on the developing fetal immune system (Pachlopnik Schmid et al., 2007). In human THP-1 monocytes and lung macrophages, exposure to cigarette smoke delayed the production of innate cytokines IL-1 $\beta$  and IL-6, and reduced glutathione levels. These effects were associated with a reduction in NF- $\kappa$ B pathway activation (Birrell et al., 2008). The effects of tobacco smoking on early immune function through alterations in cytokine production in the fetoplacental unit have been detected ex vivo in cord blood. Newborns of smoking mothers had altered signalling through Toll-like receptors, which are essential for innate microbial responses. These effects may play a part in the greater predisposition to infection among smoke-exposed infants (Prescott 2008). Chronic exposure of the bronchial epithelium to cigarette smoke caused increased production of metalloproteinases (MMP) by macrophages and of proteolytic enzymes by neutrophils (Domagala-Kulawik 2008). Chronic inhalation of cigarette smoke in rats preferentially inhibited the plaque-forming cell response of lung-associated lymph nodes to the T-cell dependent antigen SRBC (sheep red blood cells), compared with anatomically distant lymph nodes; this reduction of the antibody response primarily involved the B-cell function (Sopori et al., 1989). Chronic exposure to cigarette smoke inhibited surface immunoglobulin-mediated responses in B-cells of rats (Savage et al., 1991).

Exposure of pregnant B6C3F1 mice to inhaled mainstream cigarette smoke throughout gestation caused a significant increase in circulating white blood cell and lymphocyte counts in the offspring for up to 2.5 months after birth, a decrease in mitogen-stimulated T-lymphocyte proliferation in 3-wk-old offspring, and an increase in mixed lymphocyte response in 5-wk-old male pups, compared with corresponding effects in sex-matched, air-exposed controls (Ng & Zelikoff 2008). Exposure of ovalbumin-sensitized mice to mainstream cigarette smoke suppressed the allergic airway response and reduced eosinophilia, tissue inflammation, goblet cell metaplasia, concentrations of IL-4 and IL-5 in broncho-alveolar lavage (BAL) fluid, and ovalbumin-specific antibodies. These effects are associated with a loss of antigen-specific proliferation and cytokine production by T-cells (Thatcher et al., 2008).

Chronic inflammation (TE#12) is a known cancer promoter that is induced by smoking as reported in studies in humans in vivo and in human cells or organ explants in vitro (van der Vaart et al., 2004; Smith et al., 2006; Walser et al., 2008; Zhou et al., 2009).

Metals found in tobacco smoke, which may have a role in lung carcinogenesis, interfere with apoptosis (TE#13) as was reported in studies in humans in vivo (Stavrides 2006). In-vitro treatment of human airway epithelial cells with nicotine or NNK attenuated apoptosis and partially induced a transformed phenotype, with loss of contact inhibition and independence from exogenous growth factors (West et al., 2003).

Both active smoking and exposure to second-hand smoke are irritants (TE#14) that increase the risk of chronic rhinitis (Higgins & Reh, 2012), and may cause bronchial irritation leading to asthma. In-

utero exposure to maternal smoking may be independently responsible for early-onset asthma (Jindal & Gupta 2004).

Components of cigarette smoke have effects on the cell cycle (TE#15). In a study of 188 primary human lung adenocarcinomas, somatic mutations were detected for several tumour-suppressor genes involved in critical pathways of cell proliferation, e.g. the ATM gene, which encodes a cell-cycle checkpoint kinase that functions as a regulator of TP53 (Ding et al., 2008). Cigarette-smoke extract was shown to induce G1 cell-cycle arrest in endothelial cells in vitro (Henderson et al., 2008). In murine or human lung epithelial cells, DNA synthesis was inhibited after exposure to benzo(a)pyrene (B(a)P), an important combustion product in tobacco smoke, along with activation of the DNA-damage checkpoint. Co-treatment with nicotine compromised the growth restriction and induced upregulation of cyclins D and A. Nicotine is thus able to override the DNA-damage checkpoint activated by a tobacco-related carcinogen (Nishioka et al., 2011).

The tobacco-smoke constituent 4-aminobiphenyl induced chromosomal instability (TE#16) in human cancer cells in vitro (Saletta et al., 2007). Similarly, cigarette-smoke condensate induced genetic instability in human airway epithelial cells (Hays et al., 2008). In vivo, short-term exposure to mainstream or side-stream tobacco smoke – STS, the main component of second-hand smoke – induced mutations (TE#5) at an expanded simple tandem-repeat locus (Ms6-hm) in mouse sperm (Marchetti et al., 2011). Cigarette smoke induced telomere dysfunction and chromosomal instability in mouse embryos in vitro (Huang et al., 2010). Lung adenocarcinomas obtained from never smokers and smokers harbour different regions of genetic alteration and display different levels of genomic instability. Microsatellite instability has been found in DNA samples from colon cancer of smokers (Slattery et al., 2000).

Receptor-mediated effects (TE#17) of various tobacco products were reported in studies with human placental tissue after maternal smoking (Wang et al., 1988), in human epidermal melanocytes exposed in vitro to tobacco-smoke extract (Nakamura et al., 2013), in human adenocarcinoma cells exposed in vitro to NNK (Schuller et al., 1999), and in mouse hepatoma cells exposed in vitro to cigarette-smoke condensate (Meek & Finch, 1999; Dertinger et al., 1998).

Cigarette-smoke condensate and NNK induced malignant transformation of human cells (TE#23) in vitro (Narayan et al., 2004; Zhou et al., 2003).

### **Updated PubMed search**

Protein adducts (TE#3) were found in guinea-pigs exposed to cigarette smoke in vivo, and in serum of human smokers (Ghosh et al., 2012). Studies of human cells exposed to cigarette-smoke condensate in vitro revealed (TE#6) histone alterations, hypermethylation (Word et al., 2013), histone acetylation (Sundar et al., 2014) and repression of microRNAs (Xi et al., 2013). Cigarette-smoke condensate (CSC) caused malignant transformation of human MCF-10A breast epithelial cells (TE#23). This transforming capacity was linked to the presence of cadmium in the CSC, since treatment of the cells with CdCl<sub>2</sub> had comparable transforming effects (Mohapatra et al., 2014).

### **TCDD (IARC, 2012f)**

Most, if not all the effects of TCDD (2,3,7,8-tetrachlorodibenzo-para-dioxin, 2,3,7,8-TCDD, dioxin) are related to its binding to and activation of the aryl hydrocarbon receptor (AhR).

TCDD is not directly genotoxic. It induced DNA strand breaks (TE#1) as a result of oxidative stress (TE#2) in human breast carcinoma cell lines (Lin et al., 2007) and it modulated DNA strand-break induction by estrogen in these cells (Lin et al., 2008). TCDD caused single-strand breaks in liver DNA of rats treated in vivo, in conjunction with lipid peroxidation (Wahba et al., 1988). These effects may be related to a TCDD-induced increase in the bioavailability of iron (Wahba et al., 1989). Formation of

oxidative DNA damage upon treatment with TCDD was more pronounced in intact rats compared with ovariectomized rats, possibly as a result of enhanced metabolic activation of estrogens to catechols by TCDD-induced enzymes. Expression of CYP1B1, an enzyme with estrogen hydroxylase activity, was induced by TCDD (Tritscher et al., 1996; Wyde et al., 2001). Sustained oxidative stress was observed in TCDD-treated mice (Shertzer et al., 1998). In the [32P]-postlabeling assay, TCDD-specific DNA adducts were not detected in the liver of treated male or female rats; however, in this assay TCDD caused a dose-dependent decrease in several I-compounds in the liver of female, but not male rats; this effect was not seen in the kidney. These findings correlate with the organ/sex specificity of TCDD as a carcinogen. Experiments with differently substituted dibenzodioxins showed that their effects on hepatic I-compounds correlated with their corresponding structure–Ah receptor binding (Randerath et al., 1988; Randerath et al., 1990).

TCDD is clastogenic in various test systems (TE#4). It induced micronuclei in lymphocytes of two TCDD-intoxicated subjects (Valic et al., 2004), in cultured human lymphocytes (Nagayama et al., 1993), in primary rat hepatocytes in vitro (Türkez et al., 2012a), and in rats exposed in vivo (Türkez et al., 2012b). Increased frequencies of chromosomal aberrations were found in fetal tissues in a group of TCDD-exposed pregnancies after the Seveso accident (Tenchini et al., 1983). Increased frequencies of chromosome aberrations and sister chromatid exchange (SCE) were measured in sheep exposed to high levels of TCDD during pasturage (Perucatti et al., 2006).

TCDD induced intra-chromosomal recombination (TE#4) in mice in vivo (Schiestl et al., 1997). TCDD was mutagenic (TE#5) in the mouse lymphoma assay (Rogers et al., 1982) and in various other tests for mutagenicity (*Escherichia coli*, yeast), but did not give a mutagenic response in *Salmonella typhimurium* (Giri 1986). TCDD suppressed the expression of the checkpoint protein Mad2, which has an important role in accurate chromosome segregation in mitotic cells. This effect was also seen in AhR-deficient (-/-) mouse embryonic fibroblasts (MEF). TCDD thus increased chromosomal instability (TE#16) through the suppression of Mad2 expression through an AhR-independent pathway (Oikawa et al., 2001a).

TCDD induced changes gene expression (TE#7) in human and animal cells in vitro, and in animals in vivo (Kim et al. 2009b; Dere et al., 2006). In a comparative inter-species analysis of the effects of TCDD on hepatic gene expression in rats and mice, responses conserved between species were associated with xenobiotic and chemical stress, and with alterations in amino acid and lipid metabolism (Boverhof et al., 2006). A two-fold or greater downregulation of about 60 hepatic genes was found in rats after subchronic exposure (13 weeks) to TCDD (Ovando et al., 2006).

TCDD is a strong inducer of several cytochrome-associated enzymes (TE#7), in particular CYP1A1 (Denison & Whitlock 1995; Micka et al., 1997; Whitlock 1999) and CYP1B1 (Tritscher et al., 1996; Wyde et al., 2001).

TCDD induces epigenetic effects (TE#6) (not discussed in Monograph Vol. 100F; see review by Baccarelli & Bollati 2009). Analysis of T-cells in mesenteric lymph nodes during chemically induced acute colitis in mice revealed increased methylation of CpG islands in the immune regulator *Foxp3* and demethylation of *IL-17* promoters. Both effects were reversed upon treatment with TCDD: the activation of AhR by TCDD thus led to demethylation or methylation of regulatory genes (Singh et al., 2011). Changes in DNA methylation and gene expression were observed in splenocytes of mice upon TCDD-induced suppression of the lipopolysaccharide-stimulated IgM response (McClure et al., 2011). Acetylation of histones H3 and H4 and tri-methylation of histone H3 were detected at the promoter regions of CYP1A1 and CYP1B1 in human MCF-7 breast cancer cells and in human HepG2 hepatic cancer cells exposed to TCDD (Beedanagari et al., 2010). A single intraperitoneal dose of TCDD dysregulated the expression of the microRNAs miR101a and miR122 in mice (Yoshioka et al., 2011). In mouse embryo fibroblasts exposed to TCDD in vitro, miR101a was one of five prominently upregulated miRNAs (Huimonen et al., 2014).

In female rats initiated with diethyl-nitrosamine and subsequently treated with TCDD, persistent liver-cell proliferation (TE#15) and growth of enzyme-altered foci were seen after chronic exposure during 30 weeks followed by cessation of treatment (Tritscher et al., 1995). TCDD induced expression of AhR-responsive genes in the pituitary of mice treated in vivo (Huang et al., 2002). TCDD increased CYP1A1 mRNA expression in the retina of mice treated in vivo. It also promoted the expression of vascular endothelial growth factor-A in the retina and the retinal pigment epithelium of these mice, as well as in human retinal pigment epithelial cells (Takeuchi et al., 2009). Inherent differences were observed in TCDD-mediated gene-expression responses between mouse hepatoma cells in vitro and in hepatic tissue from TCDD-treated mice. Induction of genes involved in xenobiotic metabolism was noted in both systems. Responses associated with cell-cycle progression and cell proliferation were only seen in vitro, whereas those associated with lipid metabolism and immune effects were observed only in vivo (Dere et al., 2006). In human CD34+ cells, TCDD modulated numerous transcripts involved in cell cycle or cell proliferation, immune response, signal transduction, ion-channel activity or calcium binding, tissue development and differentiation, and female or male fertility (Fracchiolla et al., 2011).

TCDD interferes with different cell-signalling pathways (TE#8). Alteration of cell signalling by TCDD has been observed in animals in vivo and in animal cells in vitro. TCDD activated the MAPK pathway via an AhR-independent mechanism in RAW 264.7 murine macrophages (Park et al., 2005). TCDD caused concentration-dependent anatomical rearrangements in the shape of the prosencephalic artery in zebrafish larvae through activation of Ahr2/Arnt1 pathway (Teraoka et al., 2010).

A number of epidemiological studies among populations exposed to TCDD found no clear association between exposure and altered immunological status (IARC, 1997), and immune effects of TCDD are not mentioned in Monograph Volume 100. However, TCDD has immunosuppressive and immunotoxic properties (TE#11) (Vineis & Zahm 1988; Kerkvliet 2002). In T-cells isolated from a small number of TCDD-exposed industrial workers, the capacity to proliferate upon interleukin-2 stimulation was significantly diminished, with TCDD showing a long-term immunosuppressive effect on T-helper cell function (Tomn et al., 1996). In human CD34+ cells, TCDD modulated numerous transcripts involved in cell cycle or cell proliferation, immune response, signal transduction, ion-channel activity or calcium binding, tissue development and differentiation, and female or male fertility (Fracchiolla et al., 2011). Further evidence for effects of TCDD on the immune system comes from animal studies. A single subcutaneous injection of TCDD caused a significant reduction in the number of total peripheral lymphocytes in marmosets (Neubert et al., 1993). Crossing the placenta during gestation, TCDD produced fetal thymic atrophy, inhibited thymocyte maturation and reduced expression of thymic MHC class II molecules in mice (Holladay 1999). TCDD dose-dependently reduced the number of lipopolysaccharide-induced IgM antibody-forming cells in mice; this effect was correlated with a lower frequency of CD19+/CD138+ cells (North et al., 2009). Activation of the AhR by TCDD in mice dosed orally during an acute graft-versus-host response induced a population of alloreactive donor CD4+/CD25+ regulatory T (Treg)-like cells that had potent suppressive activity in vitro (Funatake et al., 2005). TCDD had a direct effect on cultured mouse lymphocytes resulting in the selective inhibition of the differentiation of B-cells into antibody-secreting cells (Tucker et al. 1986). Direct AhR-dependent effects of TCDD in both CD4+ and CD8+ T-cell subsets in the mouse contributed to the complete suppression of the cytotoxic T lymphocyte response, indicating that expression of the AhR is not required for the development of an immune response, but is required for TCDD-induced immune suppression (Kerkvliet et al., 2002).

TCDD induced a switch from proliferation (TE#15) to terminal differentiation in primary cultures of human keratinocytes (Berkers et al., 1995). The 17-beta-estradiol-stimulated cell proliferation and increase in cellular DNA content of estrogen-responsive MCF-7 human breast-cancer cells were both inhibited by TCDD. This effect was not seen in MDA-MB-231 breast-cancer cells, which are non-responsive to estrogen (Biegel & Safe 1990). Positive dose-response relationships were seen for the effects of TCDD on cell proliferation and growth of altered hepatic foci in female rats exposed in vivo

(Maronpot et al., 1993). The dose–response was different from that observed for the effects of TCDD on CYP450 gene expression in the same test system (Tritscher et al., 1992).

TCDD inhibited apoptosis (TE#13) in human bronchial epithelial cells in vitro (Chen et al., 2014). TCDD stimulated proliferation of human SaOS-2 osteogenic sarcoma cells, increased the synthesis of alkaline phosphatase, and reduced apoptosis in a dose-dependent manner (Guo et al., 2008). TCDD caused an early increase in intracellular calcium and subsequent apoptosis in human L-MAT lymphoblastic T-cells, which do not express the AhR. An antagonist of calcium-dependent calmodulin blocked this effect, which suggests that calcium/calmodulin signals play an important part in the induction of apoptosis in L-MAT cells by TCDD (Kobayashi et al., 2009). In SHSY5Y human neuroblastoma cells in vitro, TCDD induced loss of viability, which was linked to increased caspase-3 activity, PARP-1 fragmentation, DNA laddering, nuclear fragmentation and hypo-diploid (apoptotic) DNA content (Morales-Hernández et al., 2012). Male rats treated orally with TCDD showed functional and structural damages as well as apoptosis in spermatogenic cells. These effects were associated with lipid peroxidation (Sönmez et al., 2011). In rabbit chondrocytes in vitro, TCDD caused an increase of apoptotic effects in a dose-dependent manner. This effect was blocked by inhibitors of reactive oxygen species (ROS) or nitric oxide (NO), suggesting that the increase in apoptosis was mediated via ROS/NO-dependent pathways (Yang & Lee 2010). In primary rat hepatocytes in vitro, TCDD inhibited UVC-induced apoptosis; this effect was dependent on AhR-activation (Chopra et al., 2010). TCDD induced apoptotic cell death with nuclear fragmentation and DNA laddering in cerebellar granule cells (CGC) from AhR+/+ but not AhR–/– mice (Sánchez-Martin et al., 2011). TCDD significantly induced apoptosis in primary cortical neurons of the rat and in differentiated rat PC12 pheochromocytoma cells. The activation of MAPK signalling pathways was associated with this TCDD-mediated neuronal apoptosis (Xu et al., 2013c).

TCDD induces a wide variety of AhR-mediated effects (TE#17). AhR activation by TCDD enhanced the invasiveness of human gastric cancer cells, likely through a c-Jun-dependent induction of matrix metalloproteinase-9 (Peng et al., 2009). Exposure to TCDD significantly decreased the plasma insulin concentration after a glucose challenge in AhR+/+ mice but not in AhR–/– mice (Kurita et al., 2009). TCDD increased the serum glucose levels in AhR-sensitive C57BL/6J mice, but not in the less sensitive DBA/2J mice. The expression of intestinal mRNAs encoding sodium-glucose co-transporter 1 (SGLT1) and glucose transporter type 2 were thus increased only in the C57BL/6J mice by TCDD (Ishida et al., 2005). In mouse hepatoma Hepa-1c1c7 cells, TCDD increased mRNA expression of the gene encoding phospholipase A(2)alpha and enhanced the activity of the corresponding enzyme, while these effects were not observed in AhR-defective c12 cells (Kinehara et al., 2009). TCDD induced AhR-mediated apoptosis in the avian DT40 pre-B-cell line through activation of caspases 9 and 3 (Puebla-Osorio et al., 2004). TCDD induced plasminogen activator inhibitor-1 through an AhR-mediated pathway in mouse hepatoma cells (Son & Rozman, 2002). Short-term in-vitro exposure of MRC-7 human breast cancer cells to TCDD resulted in the suppression of estrogen receptor-alpha protein expression (Marquez-Bravo & Gierthy 2008).

TCDD interferes with endogenous hormones (TE#18). TCDD induced enzymes that increased metabolism of endogenous estrogens to catechols in rats (Tritscher et al., 1996; Wyde et al., 2001). TCDD induced estrogenic action or inhibited estrogen-induced effects in various tissues because of cross-talk between the estrogen receptor and AhR (Ohtake et al., 2008). TCDD affected the expression levels of a series of estrogen-responsive genes in MCF-7 human breast carcinoma cells and RL95–2 human endometrial carcinoma cells (Tanaka et al., 2007).

TCDD promoted the transformation (TE#23) of C3H/10T1/2 cells pre-treated with N-methyl-N'-nitro-N-nitrosoguanidine (MNNG) (Abernethy et al., 1985). Dysregulation of growth regulatory factors such as PAI-2, TGF-beta1 and TNF-alpha were suggested to be involved in TCDD-induced transformation of human cells (Yang et al., 1999). TCDD immortalized normal human keratinocytes in

an AhR-dependent process, presumably by suppressing two key initiators of senescence, p16INK4a and p53. This suppression was accompanied by promoter methylation (Ray & Swanson, 2004).

### Updated PubMed search

TCDD induces effects on cell-signalling pathways (TE#8). TCDD suppressed the attachment of spheroids onto human endometrial epithelial cells by inducing CYP1A1 expression and by modulating the Wnt-signalling pathway (Tsang et al., 2012). In human bronchial epithelial cells, TCDD inhibited the apoptotic effect of staurosporine, at least in part, through activation of the Akt and ERK1/2 signalling pathways (Chen et al., 2014). In the rat brain cortex and in rat PC12 neuronal cells, TCDD caused a significant downregulation of  $\beta$ -catenin and phosphoglycogen-synthase kinase-3 $\beta$  (pSer9-GSK-3 $\beta$ ), which are elements in the Wnt/ $\beta$ -catenin signalling pathway (Xu et al., 2013d). TCDD stimulated cell proliferation in the cortex of the rat brain by affecting the Akt/GSK-3 $\beta$ /cyclin D1 signalling pathway (Xu et al., 2014b).

TCDD causes Epigenetic effects (TE#6). TCDD induced epigenetic transgenerational inheritance of adult-onset disease and epi-mutations in sperm. When gestating female rats (F0) were exposed to TCDD and F1–F3 generations were obtained in the absence of exposure, TCDD was found to promote early-onset female puberty, to affect spermatogenic cell apoptosis, and to decrease the pool size of ovarian primordial follicles. Differential DNA methylation regions were identified in the sperm of all males in the F1–F3 generations (Manikkam et al., 2012a; Manikkam et al., 2012b).

In human glioma cells in vitro, TCDD stimulated transcription and activity of CYP19 (aromatase) (TE#7), which is responsible for estrogen synthesis. In glial cells of the brain, estrogen maintains normal brain function, ranging from neurotransmission to synapse formation. Therefore, this effect of TCDD may perturb hormonal balance in the brain (Tan et al., 2013). TCDD induced genomic instability (TE#16) in mouse embryonic fibroblasts (Korkalainen et al., 2012).

## REFERENCES

- Abernethy, D. J., W. F. Greenlee, J. C. Huband, and C. J. Boreiko. 1985. 2,3,7,8-Tetrachlorodibenzo-p-dioxin (TCDD) promotes the transformation of C3H/10T1/2 cells. *Carcinogenesis*. 6 (4):651-3. doi:10.1093/carcin/6.4.651.
- Achanzar, W. E., E. M. Brambila, B. A. Diwan, M. M. Webber, and M. P. Waalkes. 2002. Inorganic arsenite-induced malignant transformation of human prostate epithelial cells. *J Natl Cancer Inst*. 94 (24):1888-91. doi:10.1093/jnci/94.24.1888.
- Agar, N. S., G. M. Halliday, R. S. Barnetson, H. N. Ananthaswamy, M. Wheeler, and A. M. Jones. 2004. The basal layer in human squamous tumors harbors more UVA than UVB fingerprint mutations: a role for UVA in human skin carcinogenesis. *Proc Natl Acad Sci U S A*. 101 (14):4954-9. doi:10.1073/pnas.0401141101.
- Ahrendt, S. A., P. A. Decker, E. A. Alawi, Y. R. Zhu Yr, M. Sanchez-Cespedes, S. C. Yang, et al. 2001. Cigarette smoking is strongly associated with mutation of the K-ras gene in patients with primary adenocarcinoma of the lung. *Cancer*. 92 (6):1525-30. doi:10.1002/1097-0142(20010915)92:6<1525::aid-cnrc1478>3.0.co;2-h.
- Aldous, W. K., A. J. Marean, M. J. DeHart, L. A. Matej, and K. H. Moore. 1999. Effects of tamoxifen on telomerase activity in breast carcinoma cell lines. *Cancer*. 85 (7):1523-9.



- Ambrosone, C. B., S. Kropp, J. Yang, S. Yao, P. G. Shields, and J. Chang-Claude. 2008. Cigarette smoking, N-acetyltransferase 2 genotypes, and breast cancer risk: pooled analysis and meta-analysis. *Cancer Epidemiol Biomarkers Prev.* 17 (1):15-26. doi:10.1158/1055-9965.Epi-07-0598.
- Applegate, L. A., R. D. Ley, J. Alcala, and M. L. Kripke. 1989. Identification of the molecular target for the suppression of contact hypersensitivity by ultraviolet radiation. *J Exp Med.* 170 (4):1117-31. doi:10.1084/jem.170.4.1117.
- Arzumanyan, A., T. Friedman, E. Kotei, I. O. Ng, Z. Lian, and M. A. Feitelson. 2012. Epigenetic repression of E-cadherin expression by hepatitis B virus x antigen in liver cancer. *Oncogene.* 31 (5):563-72. doi:10.1038/onc.2011.255.
- Atawodi, S. E., S. Lea, F. Nyberg, A. Mukeria, V. Constantinescu, W. Ahrens, et al. 1998. 4-Hydroxy-1-(3-pyridyl)-1-butanone-hemoglobin adducts as biomarkers of exposure to tobacco smoke: validation of a method to be used in multicenter studies. *Cancer Epidemiol Biomarkers Prev.* 7 (9):817-21.
- Baccarelli, A., and V. Bollati. 2009. Epigenetics and environmental chemicals. *Curr Opin Pediatr.* 21 (2):243-51.
- Balsano, C., M. L. Avantaggiati, G. Natoli, E. De Marzio, H. Will, M. Perricaudet, et al. 1991. Full-length and truncated versions of the hepatitis B virus (HBV) X protein (pX) transactivate the cmyc protooncogene at the transcriptional level. *Biochem Biophys Res Commun.* 176 (3):985-92. doi:10.1016/0006-291x(91)90379-l.
- Banerjee, G., N. Gupta, A. Kapoor, and G. Raman. 2005. UV induced bystander signaling leading to apoptosis. *Cancer Lett.* 223 (2):275-84. doi:10.1016/j.canlet.2004.09.035.
- Barchowsky, A., E. J. Dudek, M. D. Treadwell, and K. E. Wetterhahn. 1996. Arsenic induces oxidant stress and NF-kappa B activation in cultured aortic endothelial cells. *Free Radic Biol Med.* 21 (6):783-90.
- Barchowsky, A., L. R. Klei, E. J. Dudek, H. M. Swartz, and P. E. James. 1999. Stimulation of reactive oxygen, but not reactive nitrogen species, in vascular endothelial cells exposed to low levels of arsenite. *Free Radic Biol Med.* 27 (11-12):1405-12.
- Bartsch, H., M. Castegnaro, A. M. Camus, A. Schouft, O. Geneste, M. Rojas, et al. 1993. Analysis of DNA adducts in smokers' lung and urothelium by 32P-postlabelling: metabolic phenotype dependence and comparisons with other exposure markers. *IARC Sci Publ.* (124):331-40.
- Bartsch, H., and J. Nair. 2004. Oxidative stress and lipid peroxidation-derived DNA-lesions in inflammation driven carcinogenesis. *Cancer Detect Prev.* 28 (6):385-91. doi:10.1016/j.cdp.2004.07.004.

- Bartsch, H., and J. Nair. 2006. Chronic inflammation and oxidative stress in the genesis and perpetuation of cancer: role of lipid peroxidation, DNA damage, and repair. *Langenbecks Arch Surg.* 391 (5):499-510. doi:10.1007/s00423-006-0073-1.
- Batista, L. F., B. Kaina, R. Meneghini, and C. F. Menck. 2009. How DNA lesions are turned into powerful killing structures: insights from UV-induced apoptosis. *Mutat Res.* 681 (2-3):197-208. doi:10.1016/j.mrrev.2008.09.001.
- Becker, S. A., T. H. Lee, J. S. Butel, and B. L. Slagle. 1998. Hepatitis B virus X protein interferes with cellular DNA repair. *J Virol.* 72 (1):266-72.
- Beedanagari, S. R., R. T. Taylor, P. Bui, F. Wang, D. W. Nickerson, and O. Hankinson. 2010. Role of epigenetic mechanisms in differential regulation of the dioxin-inducible human CYP1A1 and CYP1B1 genes. *Mol Pharmacol.* 78 (4):608-16. doi:10.1124/mol.110.064899.
- Belinsky, S. A. 2005. Silencing of genes by promoter hypermethylation: key event in rodent and human lung cancer. *Carcinogenesis.* 26 (9):1481-7. doi:10.1093/carcin/bgi020.
- Belinsky, S. A., K. J. Nikula, W. A. Palmisano, R. Michels, G. Saccomanno, E. Gabrielson, et al. 1998. Aberrant methylation of p16(INK4a) is an early event in lung cancer and a potential biomarker for early diagnosis. *Proc Natl Acad Sci U S A.* 95 (20):11891-6. doi:10.1073/pnas.95.20.11891.
- Belinsky, S. A., W. A. Palmisano, F. D. Gilliland, L. A. Crooks, K. K. Divine, S. A. Winters, et al. 2002. Aberrant promoter methylation in bronchial epithelium and sputum from current and former smokers. *Cancer Res.* 62 (8):2370-7.
- Benbrahim-Tallaa, L., R. A. Waterland, M. Styblo, W. E. Achanzar, M. M. Webber, and M. P. Waalkes. 2005a. Molecular events associated with arsenic-induced malignant transformation of human prostatic epithelial cells: aberrant genomic DNA methylation and K-ras oncogene activation. *Toxicol Appl Pharmacol.* 206 (3):288-98. doi:10.1016/j.taap.2004.11.017.
- Benbrahim-Tallaa, L., M. M. Webber, and M. P. Waalkes. 2005b. Acquisition of androgen independence by human prostate epithelial cells during arsenic-induced malignant transformation. *Environ Health Perspect.* 113 (9):1134-9. doi:10.1289/ehp.7832.
- Benbrahim-Tallaa, L., M. M. Webber, and M. P. Waalkes. 2007. Mechanisms of acquired androgen independence during arsenic-induced malignant transformation of human prostate epithelial cells. *Environ Health Perspect.* 115 (2):243-7. doi:10.1289/ehp.9630.
- Benedict, W. F., A. Banerjee, K. K. Kangalingam, D. R. Dansie, R. E. Kouri, and C. J. Henry. 1984. Increased sister-chromatid exchange in bone-marrow cells of mice exposed to whole cigarette smoke. *Mutat Res.* 136 (1):73-80.

- Berkers, J. A., I. Hassing, B. Spenkelink, A. Brouwer, and B. J. Blaauboer. 1995. Interactive effects of 2,3,7,8-tetrachlorodibenzo-p-dioxin and retinoids on proliferation and differentiation in cultured human keratinocytes: quantification of cross-linked envelope formation. *Arch Toxicol.* 69 (6):368-78.
- Bertoletti, A., and A. J. Gehring. 2006. The immune response during hepatitis B virus infection. *J Gen Virol.* 87 (Pt 6):1439-49. doi:10.1099/vir.0.81920-0.
- Bhalla, D. K., F. Hirata, A. K. Rishi, and C. G. Gairola. 2009. Cigarette smoke, inflammation, and lung injury: a mechanistic perspective. *J Toxicol Environ Health B Crit Rev.* 12 (1):45-64. doi:10.1080/10937400802545094.
- Bhutani, M., A. K. Pathak, Y. H. Fan, D. D. Liu, J. J. Lee, H. Tang, et al. 2008. Oral epithelium as a surrogate tissue for assessing smoking-induced molecular alterations in the lungs. *Cancer Prev Res (Phila).* 1 (1):39-44. doi:10.1158/1940-6207.Capr-08-0058.
- Biegel, L., and S. Safe. 1990. Effects of 2,3,7,8-tetrachlorodibenzo-p-dioxin (TCDD) on cell growth and the secretion of the estrogen-induced 34-, 52- and 160-kDa proteins in human breast cancer cells. *J Steroid Biochem Mol Biol.* 37 (5):725-32.
- Birkett, N., M. Al-Zoughool, M. Bird, J. Zielinski, and D. Krewski. 2019. Overview of biological mechanisms of human carcinogens. *J Toxicol Environ Health B.* In press.
- Birrell, M. A., S. Wong, M. C. Catley, and M. G. Belvisi. 2008. Impact of tobacco-smoke on key signaling pathways in the innate immune response in lung macrophages. *J Cell Physiol.* 214 (1):27-37. doi:10.1002/jcp.21158.
- Bond, J. A., B. T. Chen, W. C. Griffith, and J. L. Mauderly. 1989. Inhaled cigarette smoke induces the formation of DNA adducts in lungs of rats. *Toxicol Appl Pharmacol.* 99 (1):161-72.
- Boverhof, D. R., L. D. Burgoon, C. Tashiro, B. Sharratt, B. Chittim, J. R. Harkema, et al. 2006. Comparative toxicogenomic analysis of the hepatotoxic effects of TCDD in Sprague Dawley rats and C57BL/6 mice. *Toxicol Sci.* 94 (2):398-416. doi:10.1093/toxsci/kfl100.
- Bowman, A., L. M. Martinez-Levasseur, K. Acevedo-Whitehouse, D. Gendron, and M. A. Birch-Machin. 2013. The simultaneous detection of mitochondrial DNA damage from sun-exposed skin of three whale species and its association with UV-induced microscopic lesions and apoptosis. *Mitochondrion.* 13 (4):342-9. doi:10.1016/j.mito.2013.04.003.
- Brandt, S., H. Heller, K. D. Schuster, and J. Grote. 2005. The tamoxifen-induced suppression of telomerase activity in the human hepatoblastoma cell line HepG2: a result of post-translational regulation. *J Cancer Res Clin Oncol.* 131 (2):120-8. doi:10.1007/s00432-004-0589-0.

- Brash, D. E., A. Ziegler, A. S. Jonason, J. A. Simon, S. Kunala, and D. J. Leffell. 1996. Sunlight and sunburn in human skin cancer: p53, apoptosis, and tumor promotion. *J Invest Dermatol Symp Proc.* 1 (2):136-42.
- Bryant, M. S., P. L. Skipper, S. R. Tannenbaum, and M. Maclure. 1987. Hemoglobin adducts of 4-aminobiphenyl in smokers and nonsmokers. *Cancer Res.* 47 (2):602-8.
- Chanda, S., U. B. Dasgupta, D. Guhamazumder, M. Gupta, U. Chaudhuri, S. Lahiri, et al. 2006. DNA hypermethylation of promoter of gene p53 and p16 in arsenic-exposed people with and without malignancy. *Toxicol Sci.* 89 (2):431-7. doi:10.1093/toxsci/kfj030.
- Charlier, C., A. Chariot, N. Antoine, M. P. Merville, J. Gielen, and V. Castronovo. 1995. Tamoxifen and its active metabolite inhibit growth of estrogen receptor-negative MDA-MB-435 cells. *Biochem Pharmacol.* 49 (3):351-8.
- Chen, P. H., C. C. Lan, M. H. Chiou, M. C. Hsieh, and G. S. Chen. 2005. Effects of arsenic and UVB on normal human cultured keratinocytes: impact on apoptosis and implication on photocarcinogenesis. *Chem Res Toxicol.* 18 (2):139-44. doi:10.1021/tx049834b.
- Chen, R. J., S. H. Siao, C. H. Hsu, C. Y. Chang, L. W. Chang, C. H. Wu, et al. 2014. TCDD promotes lung tumors via attenuation of apoptosis through activation of the Akt and ERK1/2 signaling pathways. *PLoS One.* 9 (6):e99586. doi:10.1371/journal.pone.0099586.
- Chen, W., J. Kang, J. Xia, Y. Li, B. Yang, B. Chen, et al. 2008. p53-related apoptosis resistance and tumor suppression activity in UVB-induced premature senescent human skin fibroblasts. *Int J Mol Med.* 21 (5):645-53.
- Cheng, P., Y. Li, L. Yang, Y. Wen, W. Shi, Y. Mao, et al. 2009. Hepatitis B virus X protein (HBx) induces G2/M arrest and apoptosis through sustained activation of cyclin B1-CDK1 kinase. *Oncol Rep.* 22 (5):1101-7. doi:10.3892/or\_00000542.
- Cho, K. S., Y. H. Yoon, J. A. Choi, S. J. Lee, and J. Y. Koh. 2012. Induction of autophagy and cell death by tamoxifen in cultured retinal pigment epithelial and photoreceptor cells. *Invest Ophthalmol Vis Sci.* 53 (9):5344-53. doi:10.1167/iovs.12-9827.
- Chopra, M., M. Gahrs, M. Haben, C. Michels, and D. Schrenk. 2010. Inhibition of apoptosis by 2,3,7,8-tetrachlorodibenzo-p-dioxin depends on protein biosynthesis. *Cell Biol Toxicol.* 26 (4):391-401. doi:10.1007/s10565-010-9151-9.
- Chung, J. H., and H. C. Eun. 2007. Angiogenesis in skin aging and photoaging. *J Dermatol.* 34 (9):593-600. doi:10.1111/j.1346-8138.2007.00341.x.
- Clippinger, A. J., T. L. Gearhart, and M. J. Bouchard. 2009. Hepatitis B virus X protein modulates apoptosis in primary rat hepatocytes by regulating both NF-kappaB and the

- mitochondrial permeability transition pore. *J Virol.* 83 (10):4718-31. doi:10.1128/jvi.02590-08.
- Codoner-Franch, P., E. Betoret, A. B. Lopez-Jaen, N. Betoret, P. Fito, and V. Valls-Belles. 2013. Dried apple enriched with mandarin juice counteracts tamoxifen-induced oxidative stress in rats. *Int J Food Sci Nutr.* 64 (7):815-21. doi:10.3109/09637486.2013.798267.
- Cougot, D., Y. Wu, S. Cairo, J. Caramel, C. A. Renard, L. Levy, et al. 2007. The hepatitis B virus X protein functionally interacts with CREB-binding protein/p300 in the regulation of CREB-mediated transcription. *J Biol Chem.* 282 (7):4277-87. doi:10.1074/jbc.M606774200.
- Courdavault, S., C. Baudouin, M. Charveron, A. Favier, J. Cadet, and T. Douki. 2004. Larger yield of cyclobutane dimers than 8-oxo-7,8-dihydroguanine in the DNA of UVA-irradiated human skin cells. *Mutat Res.* 556 (1-2):135-42. doi:10.1016/j.mrfmmm.2004.07.011.
- Croxtall, J. D., C. Emmas, J. O. White, Q. Choudhary, and R. J. Flower. 1994. Tamoxifen inhibits growth of oestrogen receptor-negative A549 cells. *Biochem Pharmacol.* 47 (2):197-202.
- D'Agostini, F., A. Izzotti, R. Balansky, N. Zanesi, C. M. Croce, and S. De Flora. 2006. Early loss of Fhit in the respiratory tract of rodents exposed to environmental cigarette smoke. *Cancer Res.* 66 (7):3936-41. doi:10.1158/0008-5472.Can-05-3666.
- Dahle, J., E. Kvam, and T. Stokke. 2005. Bystander effects in UV-induced genomic instability: antioxidants inhibit delayed mutagenesis induced by ultraviolet A and B radiation. *J Carcinog.* 4:11. doi:10.1186/1477-3163-4-11.
- Damian, D. L., C. R. Patterson, M. Stapelberg, J. Park, R. S. Barnetson, and G. M. Halliday. 2008. UV radiation-induced immunosuppression is greater in men and prevented by topical nicotinamide. *J Invest Dermatol.* 128 (2):447-54. doi:10.1038/sj.jid.5701058.
- Davey, J. C., J. E. Bodwell, J. A. Gosse, and J. W. Hamilton. 2007. Arsenic as an endocrine disruptor: effects of arsenic on estrogen receptor-mediated gene expression in vivo and in cell culture. *Toxicol Sci.* 98 (1):75-86. doi:10.1093/toxsci/kfm013.
- Davies, R., V. I. Oreffo, E. A. Martin, M. F. Festing, I. N. White, L. L. Smith, et al. 1997. Tamoxifen causes gene mutations in the livers of lambda/lacI transgenic rats. *Cancer Res.* 57 (7):1288-93.
- Dejean, A., L. Bougueleret, K. H. Grzeschik, and P. Tiollais. 1986. Hepatitis B virus DNA integration in a sequence homologous to v-erb-A and steroid receptor genes in a hepatocellular carcinoma. *Nature.* 322 (6074):70-2. doi:10.1038/322070a0.

- Deknudt, G., A. Leonard, J. Arany, G. Jenar-Du Buisson, and E. Delavignette. 1986. In vivo studies in male mice on the mutagenic effects of inorganic arsenic. *Mutagenesis*. 1 (1):33-4. doi:10.1093/mutage/1.1.33.
- DeMarini, D. M. 2004. Genotoxicity of tobacco smoke and tobacco smoke condensate: a review. *Mutat Res*. 567 (2-3):447-74. doi:10.1016/j.mrrev.2004.02.001.
- DeMarini, D. M., R. Gudi, A. Szkudlinska, M. Rao, L. Recio, M. Kehl, et al. 2008. Genotoxicity of 10 cigarette smoke condensates in four test systems: comparisons between assays and condensates. *Mutat Res*. 650 (1):15-29. doi:10.1016/j.mrgentox.2007.09.006.
- Denison, M. S., and J. P. Whitlock, Jr. 1995. Xenobiotic-inducible transcription of cytochrome P450 genes. *J Biol Chem*. 270 (31):18175-8. doi:10.1074/jbc.270.31.18175.
- Dere, E., D. R. Boverhof, L. D. Burgoon, and T. R. Zacharewski. 2006. In vivo-in vitro toxicogenomic comparison of TCDD-elicited gene expression in Hepa1c1c7 mouse hepatoma cells and C57BL/6 hepatic tissue. *BMC Genomics*. 7:80. doi:10.1186/1471-2164-7-80.
- Dertinger, S. D., A. E. Silverstone, and T. A. Gasiewicz. 1998. Influence of aromatic hydrocarbon receptor-mediated events on the genotoxicity of cigarette smoke condensate. *Carcinogenesis*. 19 (11):2037-42. doi:10.1093/carcin/19.11.2037.
- Didier, C., N. Emonet-Piccardi, J. C. Beani, J. Cadet, and M. J. Richard. 1999. L-arginine increases UVA cytotoxicity in irradiated human keratinocyte cell line: potential role of nitric oxide. *Faseb j*. 13 (13):1817-24. doi:10.1096/fasebj.13.13.1817.
- Ding, L., G. Getz, D. A. Wheeler, E. R. Mardis, M. D. McLellan, K. Cibulskis, et al. 2008. Somatic mutations affect key pathways in lung adenocarcinoma. *Nature*. 455 (7216):1069-75. doi:10.1038/nature07423.
- Domagala-Kulawik, J. 2008. Effects of cigarette smoke on the lung and systemic immunity. *J Physiol Pharmacol*. 59 Suppl 6:19-34.
- Douki, T., A. Reynaud-Angelin, J. Cadet, and E. Sage. 2003. Bipyrimidine photoproducts rather than oxidative lesions are the main type of DNA damage involved in the genotoxic effect of solar UVA radiation. *Biochemistry*. 42 (30):9221-6. doi:10.1021/bi034593c.
- Dumaz, N., A. Sary, T. Soussi, L. Daya-Grosjean, and A. Sarasin. 1994. Can we predict solar ultraviolet radiation as the causal event in human tumours by analysing the mutation spectra of the p53 gene? *Mutat Res*. 307 (1):375-86.
- Ebbesen, P., and M. L. Kripke. 1982. Influences of age and anatomical site on ultraviolet carcinogenesis in BALB/c mice. *J Natl Cancer Inst*. 68 (4):691-4.

- Eberlein-Konig, B., C. Jager, and B. Przybilla. 1998. Ultraviolet B radiation-induced production of interleukin 1alpha and interleukin 6 in a human squamous carcinoma cell line is wavelength-dependent and can be inhibited by pharmacological agents. *Br J Dermatol.* 139 (3):415-21.
- Fallot, G., C. Neuveut, and M. A. Buendia. 2012. Diverse roles of hepatitis B virus in liver cancer. *Curr Opin Virol.* 2 (4):467-73. doi:10.1016/j.coviro.2012.05.008.
- Faux, S. P., T. Tai, D. Thorne, Y. Xu, D. Breheny, and M. Gaca. 2009. The role of oxidative stress in the biological responses of lung epithelial cells to cigarette smoke. *Biomarkers.* 14 Suppl 1:90-6. doi:10.1080/13547500902965047.
- Fisher, M. S., and M. L. Kripke. 1977. Systemic alteration induced in mice by ultraviolet light irradiation and its relationship to ultraviolet carcinogenesis. *Proc Natl Acad Sci U S A.* 74 (4):1688-92. doi:10.1073/pnas.74.4.1688.
- Fisher, M. S., and M. L. Kripke. 2002. Systemic alteration induced in mice by ultraviolet light irradiation and its relationship to ultraviolet carcinogenesis. 1977. *Bull World Health Organ.* 80 (11):908-12.
- Flora, S. J. 1999. Arsenic-induced oxidative stress and its reversibility following combined administration of N-acetylcysteine and meso 2,3-dimercaptosuccinic acid in rats. *Clin Exp Pharmacol Physiol.* 26 (11):865-9.
- Fracchiolla, N. S., K. Todoerti, P. A. Bertazzi, F. Servida, P. Corradini, C. Carniti, et al. 2011. Dioxin exposure of human CD34+ hemopoietic cells induces gene expression modulation that recapitulates its in vivo clinical and biological effects. *Toxicology.* 283 (1):18-23. doi:10.1016/j.tox.2011.01.025.
- Fry, R. C., P. Navasumrit, C. Valiathan, J. P. Svensson, B. J. Hogan, M. Luo, et al. 2007. Activation of inflammation/NF-kappaB signaling in infants born to arsenic-exposed mothers. *PLoS Genet.* 3 (11):e207. doi:10.1371/journal.pgen.0030207.
- Fujisawa, H., B. Wang, S. Kondo, G. M. Shivji, and D. N. Sauder. 1997. Costimulation with ultraviolet B and interleukin-1 alpha dramatically increase tumor necrosis factor-alpha production in human dermal fibroblasts. *J Interferon Cytokine Res.* 17 (5):307-13. doi:10.1089/jir.1997.17.307.
- Funatake, C. J., N. B. Marshall, L. B. Steppan, D. V. Mourich, and N. I. Kerkvliet. 2005. Cutting edge: activation of the aryl hydrocarbon receptor by 2,3,7,8-tetrachlorodibenzo-p-dioxin generates a population of CD4+ CD25+ cells with characteristics of regulatory T cells. *J Immunol.* 175 (7):4184-8. doi:10.4049/jimmunol.175.7.4184.
- Gairola, C. G., and R. C. Gupta. 1991. Cigarette smoke-induced DNA adducts in the respiratory and nonrespiratory tissues of rats. *Environ Mol Mutagen.* 17 (4):253-7.

- Gamboa da Costa, G., P. C. Pereira, M. I. Churchwell, F. A. Beland, and M. M. Marques. 2007. DNA adduct formation in the livers of female Sprague-Dawley rats treated with toremifene or alpha-hydroxytoremifene. *Chem Res Toxicol.* 20 (2):300-10. doi:10.1021/tx600275d.
- Gao, P., C. C. Wong, E. K. Tung, J. M. Lee, C. M. Wong, and I. O. Ng. 2011. Deregulation of microRNA expression occurs early and accumulates in early stages of HBV-associated multistep hepatocarcinogenesis. *J Hepatol.* 54 (6):1177-84. doi:10.1016/j.jhep.2010.09.023.
- Gehrke, R., M. A. Brauchle, K. Reifenberg, E. Hildt, U. Gruetzner, V. Schmitz, et al. 2004. Accumulation of 8-hydroxy-2'-deoxyguanosine adducts in HBx recombinant HepG2 cells and HBx transgenic mice. *Digestion.* 70 (2):117-26. doi:10.1159/000080930.
- Germolec, D. R., J. Spalding, G. A. Boorman, J. L. Wilmer, T. Yoshida, P. P. Simeonova, et al. 1997. Arsenic can mediate skin neoplasia by chronic stimulation of keratinocyte-derived growth factors. *Mutat Res.* 386 (3):209-18.
- Ghosh, A., A. Choudhury, A. Das, N. S. Chatterjee, T. Das, R. Chowdhury, et al. 2012. Cigarette smoke induces p-benzoquinone-albumin adduct in blood serum: Implications on structure and ligand binding properties. *Toxicology.* 292 (2-3):78-89. doi:10.1016/j.tox.2011.11.014.
- Ghosh, R., P. Amstad, and P. Cerutti. 1993. UVB-induced DNA breaks interfere with transcriptional induction of c-fos. *Mol Cell Biol.* 13 (11):6992-9. doi:10.1128/mcb.13.11.6992.
- Giri, A. K. 1986. Mutagenic and genotoxic effects of 2,3,7,8-tetrachlorodibenzo-p-dioxin, a review. *Mutat Res.* 168 (3):241-8.
- Glatt, H., W. Davis, W. Meinl, H. Hermersdorfer, S. Venitt, and D. H. Phillips. 1998. Rat, but not human, sulfotransferase activates a tamoxifen metabolite to produce DNA adducts and gene mutations in bacteria and mammalian cells in culture. *Carcinogenesis.* 19 (10):1709-13. doi:10.1093/carcin/19.10.1709.
- Grant, S. G. 2005. Qualitatively and quantitatively similar effects of active and passive maternal tobacco smoke exposure on in utero mutagenesis at the HPRT locus. *BMC Pediatr.* 5:20. doi:10.1186/1471-2431-5-20.
- Griffiths, H. R., P. Mistry, K. E. Herbert, and J. Lunec. 1998. Molecular and cellular effects of ultraviolet light-induced genotoxicity. *Crit Rev Clin Lab Sci.* 35 (3):189-237. doi:10.1080/10408369891234192.
- Gu, M. 1990. [Genotoxic effect of cigarette smoke condensate on human diploid cell 2BS strain]. *Zhonghua Zhong Liu Za Zhi.* 12 (2):101-3.



- Guillot, C., N. Falette, S. Courtois, T. Voeltzel, E. Garcia, M. Ozturk, et al. 1996. Alteration of p53 damage response by tamoxifen treatment. *Clin Cancer Res.* 2 (9):1439-44.
- Guo, G. H., D. M. Tan, P. A. Zhu, and F. Liu. 2009a. Hepatitis B virus X protein promotes proliferation and upregulates TGF-beta1 and CTGF in human hepatic stellate cell line, LX-2. *Hepatobiliary Pancreat Dis Int.* 8 (1):59-64.
- Guo, L., Z. X. Huang, X. W. Chen, Q. K. Deng, W. Yan, M. J. Zhou, et al. 2009b. Differential expression profiles of microRNAs in NIH3T3 cells in response to UVB irradiation. *Photochem Photobiol.* 85 (3):765-73. doi:10.1111/j.1751-1097.2008.00482.x.
- Guo, L., Y. Y. Zhao, S. L. Zhang, K. Liu, and X. Y. Gao. 2008. [Effect of dioxin on apoptosis of osteogenic sarcoma cells and regulation on gene expression of insulin-like growth factor binding protein 6]. *Zhonghua Lao Dong Wei Sheng Zhi Ye Bing Za Zhi.* 26 (4):223-6.
- Gupta, N., A. Chakrobarty, G. Raman, and G. Banerjee. 2006. Cloning and identification of EDD gene from ultraviolet-irradiated HaCaT cells. *Photodermatol Photoimmunol Photomed.* 22 (6):278-84. doi:10.1111/j.1600-0781.2006.00251.x.
- Hackman, P., S. M. Hou, F. Nyberg, G. Pershagen, and B. Lambert. 2000. Mutational spectra at the hypoxanthine-guanine phosphoribosyltransferase (HPRT) locus in T-lymphocytes of nonsmoking and smoking lung cancer patients. *Mutat Res.* 468 (1):45-61.
- Hagen, T. M., S. Huang, J. Curnutte, P. Fowler, V. Martinez, C. M. Wehr, et al. 1994. Extensive oxidative DNA damage in hepatocytes of transgenic mice with chronic active hepatitis destined to develop hepatocellular carcinoma. *Proc Natl Acad Sci U S A.* 91 (26):12808-12. doi:10.1073/pnas.91.26.12808.
- Halliday, G. M., and S. Rana. 2008. Waveband and dose dependency of sunlight-induced immunomodulation and cellular changes. *Photochem Photobiol.* 84 (1):35-46. doi:10.1111/j.1751-1097.2007.00212.x.
- Han, Y., H. Zhao, Q. Jiang, H. Gao, and C. Wang. 2015. Chemopreventive mechanism of polypeptides from *Chlamydomonas* (PCF) against UVB-induced malignant transformation of HaCaT cells. *Mutagenesis.* 30 (2):287-96. doi:10.1093/mutage/geu071.
- Harmalkar, M., S. Upraity, S. Kazi, and N. V. Shirsat. 2015. Tamoxifen-Induced Cell Death of Malignant Glioma Cells Is Brought About by Oxidative-Stress-Mediated Alterations in the Expression of BCL2 Family Members and Is Enhanced on miR-21 Inhibition. *J Mol Neurosci.* 57 (2):197-202. doi:10.1007/s12031-015-0602-x.
- Hartwig, A., and T. Schwerdtle. 2002. Interactions by carcinogenic metal compounds with DNA repair processes: toxicological implications. *Toxicol Lett.* 127 (1-3):47-54.

- Hays, L. E., D. M. Zdzienicka, J. E. Yates, M. E. Deffenbacher, D. B. Jacoby, S. B. Olson, et al. 2008. Cigarette smoke induces genetic instability in airway epithelial cells by suppressing FANCD2 expression. *Br J Cancer*. 98 (10):1653-61. doi:10.1038/sj.bjc.6604362.
- He, Y. Y., J. Pi, J. L. Huang, B. A. Diwan, M. P. Waalkes, and C. F. Chignell. 2006. Chronic UVA irradiation of human HaCaT keratinocytes induces malignant transformation associated with acquired apoptotic resistance. *Oncogene*. 25 (26):3680-8. doi:10.1038/sj.onc.1209384.
- Hecht, S. S. 1999. Tobacco smoke carcinogens and lung cancer. *J Natl Cancer Inst*. 91 (14):1194-210. doi:10.1093/jnci/91.14.1194.
- Hecht, S. S. 2003. Tobacco carcinogens, their biomarkers and tobacco-induced cancer. *Nat Rev Cancer*. 3 (10):733-44. doi:10.1038/nrc1190.
- Hemminki, K., H. Rajaniemi, B. Lindahl, and B. Moberger. 1996. Tamoxifen-induced DNA adducts in endometrial samples from breast cancer patients. *Cancer Res*. 56 (19):4374-7.
- Henderson, B., A. Csordas, A. Backovic, M. Kind, D. Bernhard, and G. Wick. 2008. Cigarette smoke is an endothelial stressor and leads to cell cycle arrest. *Atherosclerosis*. 201 (2):298-305. doi:10.1016/j.atherosclerosis.2008.02.022.
- Higgins, T. S., and D. D. Reh. 2012. Environmental pollutants and allergic rhinitis. *Curr Opin Otolaryngol Head Neck Surg*. 20 (3):209-14. doi:10.1097/MOO.0b013e3283534821.
- Hirsimaki, P., A. Aaltonen, and E. Mantyla. 2002. Toxicity of antiestrogens. *Breast J*. 8 (2):92-6.
- Hirvonen, A., L. Nylund, P. Kociba, K. Husgafvel-Pursiainen, and H. Vainio. 1994. Modulation of urinary mutagenicity by genetically determined carcinogen metabolism in smokers. *Carcinogenesis*. 15 (5):813-5. doi:10.1093/carcin/15.5.813.
- Holladay, S. D. 1999. Prenatal immunotoxicant exposure and postnatal autoimmune disease. *Environ Health Perspect*. 107 Suppl 5:687-91. doi:10.1289/ehp.99107s5687.
- Holz, O., R. Meissner, M. Einhaus, F. Koops, K. Warncke, G. Scherer, et al. 1993. Detection of DNA single-strand breaks in lymphocytes of smokers. *Int Arch Occup Environ Health*. 65 (2):83-8.
- Horn, S., A. Figl, P. S. Rachakonda, C. Fischer, A. Sucker, A. Gast, et al. 2013. TERT promoter mutations in familial and sporadic melanoma. *Science*. 339 (6122):959-61. doi:10.1126/science.1230062.

- Huang, F. W., E. Hodis, M. J. Xu, G. V. Kryukov, L. Chin, and L. A. Garraway. 2013. Highly recurrent TERT promoter mutations in human melanoma. *Science*. 339 (6122):957-9. doi:10.1126/science.1229259.
- Huang, J., M. Okuka, M. McLean, D. L. Keefe, and L. Liu. 2010. Telomere susceptibility to cigarette smoke-induced oxidative damage and chromosomal instability of mouse embryos in vitro. *Free Radic Biol Med*. 48 (12):1663-76. doi:10.1016/j.freeradbiomed.2010.03.026.
- Huang, P., S. Ceccatelli, H. Hakansson, L. Grandison, and A. Rannug. 2002. Constitutive and TCDD-induced expression of Ah receptor-responsive genes in the pituitary. *Neurotoxicology*. 23 (6):783-93. doi:10.1016/s0161-813x(02)00040-2.
- Husgafvel-Pursiainen, K. 2004. Genotoxicity of environmental tobacco smoke: a review. *Mutat Res*. 567 (2-3):427-45. doi:10.1016/j.mrrev.2004.06.004.
- Husgafvel-Pursiainen, K., M. Ridanpaa, S. Anttila, and H. Vainio. 1995. p53 and ras gene mutations in lung cancer: implications for smoking and occupational exposures. *J Occup Environ Med*. 37 (1):69-76.
- Hussein, M. R., A. K. Haemel, O. Sudilovsky, and G. S. Wood. 2005. Genomic instability in radial growth phase melanoma cell lines after ultraviolet irradiation. *J Clin Pathol*. 58 (4):389-96. doi:10.1136/jcp.2004.021519.
- Huumonen, K., M. Korkalainen, M. Viluksela, T. Lahtinen, J. Naarala, and J. Juutilainen. 2014. Role of microRNAs and DNA Methyltransferases in Transmitting Induced Genomic Instability between Cell Generations. *Front Public Health*. 2:139. doi:10.3389/fpubh.2014.00139.
- IARC. 1997. IARC Working Group on the Evaluation of Carcinogenic Risks to Humans: Polychlorinated Dibenzo-Para-Dioxins and Polychlorinated Dibenzofurans. Lyon, France, 4-11 February 1997. *IARC Monogr Eval Carcinog Risks Hum*. 69:1-631.
- IARC. 2012a. *Pharmaceuticals*. Vol. 100A, *IARC Monogr Eval Carcinog Risks Hum*. 1-437. Available from <http://publications.iarc.fr/118>
- IARC. 2012b. *Biological agents*. Vol. 100B, *IARC Monogr Eval Carcinog Risks Hum*. 1-441. Available from <http://publications.iarc.fr/119>.
- IARC. 2012c. *Arsenic, metals, fibres, and dusts*. Vol. 100C, *IARC Monogr Eval Carcinog Risks Hum*. 1-499. Available from <http://publications.iarc.fr/120>.
- IARC. 2012d. *Radiation*. Vol. 100D, *IARC Monogr Eval Carcinog Risks Hum*. 1-437. Available from <http://publications.iarc.fr/121>

- IARC. 2012e. *Personal habits and indoor combustions*. Vol. 100E, *IARC Monogr Eval Carcinog Risks Hum.* 1-575. Available from <http://publications.iarc.fr/122>
- IARC. 2012f. *Chemical agents and related occupations*. Vol. 100F, *IARC Monogr Eval Carcinog Risks Hum.* 1-599. Available from <http://publications.iarc.fr/123>
- IARC. 2014a. *Diesel- and Gasoline-Engine Exhausts and Some Nitroarenes*. Vol. 105, *IARC Monogr Eval Carcinog Risks Hum.* Geneva: WHO Press. Available from <http://monographs.iarc.fr/ENG/Monographs/vol105/index.php>.
- Ishida, T., S. Kan-o, J. Mutoh, S. Takeda, Y. Ishii, I. Hashiguchi, et al. 2005. 2,3,7,8-Tetrachlorodibenzo-p-dioxin-induced change in intestinal function and pathology: evidence for the involvement of arylhydrocarbon receptor-mediated alteration of glucose transportation. *Toxicol Appl Pharmacol.* 205 (1):89-97. doi:10.1016/j.taap.2004.09.014.
- Jaitovich-Groisman, I., N. Benlimame, B. L. Slagle, M. H. Perez, L. Alpert, D. J. Song, et al. 2001. Transcriptional regulation of the TFIIH transcription repair components XPB and XPD by the hepatitis B virus x protein in liver cells and transgenic liver tissue. *J Biol Chem.* 276 (17):14124-32. doi:10.1074/jbc.M010852200.
- Jensen, T. J., P. Novak, K. E. Eblin, A. J. Gandolfi, and B. W. Futscher. 2008. Epigenetic remodeling during arsenical-induced malignant transformation. *Carcinogenesis.* 29 (8):1500-8. doi:10.1093/carcin/bgn102.
- Jin, Q., D. G. Menter, L. Mao, W. K. Hong, and H. Y. Lee. 2008. Survivin expression in normal human bronchial epithelial cells: an early and critical step in tumorigenesis induced by tobacco exposure. *Carcinogenesis.* 29 (8):1614-22. doi:10.1093/carcin/bgm234.
- Jindal, S. K., and D. Gupta. 2004. The relationship between tobacco smoke & bronchial asthma. *Indian J Med Res.* 120 (5):443-53.
- Jung, J. K., S. H. Park, and K. L. Jang. 2010. Hepatitis B virus X protein overcomes the growth-inhibitory potential of retinoic acid by downregulating retinoic acid receptor-beta2 expression via DNA methylation. *J Gen Virol.* 91 (Pt 2):493-500. doi:10.1099/vir.0.015149-0.
- Karube, T., Y. Odagiri, K. Takemoto, and S. Watanabe. 1989. Analyses of transplacentally induced sister chromatid exchanges and micronuclei in mouse fetal liver cells following maternal exposure to cigarette smoke. *Cancer Res.* 49 (13):3550-2.
- Kekule, A. S., U. Lauer, L. Weiss, B. Lubber, and P. H. Hofschneider. 1993. Hepatitis B virus transactivator HBx uses a tumour promoter signalling pathway. *Nature.* 361 (6414):742-5. doi:10.1038/361742a0.
- Kerkvliet, N. I. 2002. Recent advances in understanding the mechanisms of TCDD immunotoxicity. *Int Immunopharmacol.* 2 (2-3):277-91.

- Kerkvliet, N. I., D. M. Shepherd, and L. Baecher-Steppan. 2002. T lymphocytes are direct, aryl hydrocarbon receptor (AhR)-dependent targets of 2,3,7,8-tetrachlorodibenzo-p-dioxin (TCDD): AhR expression in both CD4<sup>+</sup> and CD8<sup>+</sup> T cells is necessary for full suppression of a cytotoxic T lymphocyte response by TCDD. *Toxicol Appl Pharmacol.* 185 (2):146-52.
- Khan, P. K., V. P. Kesari, and A. Kumar. 2013. Mouse micronucleus assay as a surrogate to assess genotoxic potential of arsenic at its human reference dose. *Chemosphere.* 90 (3):993-7. doi:10.1016/j.chemosphere.2012.07.021.
- Kielbassa, C., L. Roza, and B. Epe. 1997. Wavelength dependence of oxidative DNA damage induced by UV and visible light. *Carcinogenesis.* 18 (4):811-6. doi:10.1093/carcin/18.4.811.
- Kim, J. S., H. Kim, Y. M. Shim, J. Han, J. Park, and D. H. Kim. 2004. Aberrant methylation of the FHIT gene in chronic smokers with early stage squamous cell carcinoma of the lung. *Carcinogenesis.* 25 (11):2165-71. doi:10.1093/carcin/bgh217.
- Kim, M. K., S. Lee, E. J. Kim, K. H. Kong, D. H. Lee, and J. H. Chung. 2013. Topical application of anacardic acid (6-nonadecyl salicylic acid) reduces UV-induced histone modification, MMP-13, MMP-9, COX-2 and TNF- $\alpha$  expressions in hairless mice skin. *J Dermatol Sci.* 70 (1):64-7. doi:10.1016/j.jdermsci.2012.11.008.
- Kim, M. K., J. M. Shin, H. C. Eun, and J. H. Chung. 2009a. The role of p300 histone acetyltransferase in UV-induced histone modifications and MMP-1 gene transcription. *PLoS One.* 4 (3):e4864. doi:10.1371/journal.pone.0004864.
- Kim, S., E. Dere, L. D. Burgoon, C. C. Chang, and T. R. Zacharewski. 2009b. Comparative analysis of AhR-mediated TCDD-elicited gene expression in human liver adult stem cells. *Toxicol Sci.* 112 (1):229-44. doi:10.1093/toxsci/kfp189.
- Kinehara, M., I. Fukuda, K. Yoshida, and H. Ashida. 2009. Aryl hydrocarbon receptor-mediated induction of the cytosolic phospholipase A(2) $\alpha$  gene by 2,3,7,8-tetrachlorodibenzo-p-dioxin in mouse hepatoma Hepa-1c1c7 cells. *J Biosci Bioeng.* 108 (4):277-81. doi:10.1016/j.jbiosc.2009.04.015.
- Kligerman, A. D., C. L. Doerr, A. H. Tennant, K. Harrington-Brock, J. W. Allen, E. Winkfield, et al. 2003. Methylated trivalent arsenicals as candidate ultimate genotoxic forms of arsenic: induction of chromosomal mutations but not gene mutations. *Environ Mol Mutagen.* 42 (3):192-205. doi:10.1002/em.10192.
- Kobayashi, D., S. Ahmed, M. Ishida, S. Kasai, and H. Kikuchi. 2009. Calcium/calmodulin signaling elicits release of cytochrome c during 2,3,7,8-tetrachlorodibenzo-p-dioxin-induced apoptosis in the human lymphoblastic T-cell line, L-MAT. *Toxicology.* 258 (1):25-32. doi:10.1016/j.tox.2009.01.002.

- Koch-Paiz, C. A., S. A. Amundson, M. L. Bittner, P. S. Meltzer, and A. J. Fornace, Jr. 2004. Functional genomics of UV radiation responses in human cells. *Mutat Res.* 549 (1-2):65-78. doi:10.1016/j.mrfmmm.2004.01.010.
- Komissarova, E. V., S. K. Saha, and T. G. Rossman. 2005. Dead or dying: the importance of time in cytotoxicity assays using arsenite as an example. *Toxicol Appl Pharmacol.* 202 (1):99-107. doi:10.1016/j.taap.2004.06.010.
- Korkalainen, M., K. Huumonen, J. Naarala, M. Viluksela, and J. Juutilainen. 2012. Dioxin induces genomic instability in mouse embryonic fibroblasts. *PLoS One.* 7 (5):e37895. doi:10.1371/journal.pone.0037895.
- Kurita, H., W. Yoshioka, N. Nishimura, N. Kubota, T. Kadowaki, and C. Tohyama. 2009. Aryl hydrocarbon receptor-mediated effects of 2,3,7,8-tetrachlorodibenzo-p-dioxin on glucose-stimulated insulin secretion in mice. *J Appl Toxicol.* 29 (8):689-94. doi:10.1002/jat.1459.
- Lambert, B., I. Berndtsson, J. Lindsten, M. Nordenskjold, S. Soderhall, B. Holmstedt, et al. 1982. Smoking and sister chromatid exchange. *Prog Clin Biol Res.* 109:401-14.
- Larramendy, M. L., and S. Knuutila. 1991. Increased frequency of micronuclei in B and T8 lymphocytes from smokers. *Mutat Res.* 259 (2):189-95.
- Lee, S., H. J. Lee, J. H. Kim, H. S. Lee, J. J. Jang, and G. H. Kang. 2003. Aberrant CpG island hypermethylation along multistep hepatocarcinogenesis. *Am J Pathol.* 163 (4):1371-8. doi:10.1016/s0002-9440(10)63495-5.
- Lee, T. C., N. Tanaka, P. W. Lamb, T. M. Gilmer, and J. C. Barrett. 1988. Induction of gene amplification by arsenic. *Science.* 241 (4861):79-81. doi:10.1126/science.3388020.
- Lee, Y. I., J. M. Hwang, J. H. Im, Y. I. Lee, N. S. Kim, D. G. Kim, et al. 2004. Human hepatitis B virus-X protein alters mitochondrial function and physiology in human liver cells. *J Biol Chem.* 279 (15):15460-71. doi:10.1074/jbc.M309280200.
- Lesser, M. P., V. A. Kruse, and T. M. Barry. 2003. Exposure to ultraviolet radiation causes apoptosis in developing sea urchin embryos. *J Exp Biol.* 206 (Pt 22):4097-103. doi:10.1242/jeb.00621.
- Lewinska, D., J. Arkusz, M. Stanczyk, J. Palus, E. Dziubaltowska, and M. Stepnik. 2007. Comparison of the effects of arsenic and cadmium on benzo(a)pyrene-induced micronuclei in mouse bone-marrow. *Mutat Res.* 632 (1-2):37-43. doi:10.1016/j.mrgentox.2007.04.015.
- Li, J. H., and T. G. Rossman. 1989. Inhibition of DNA ligase activity by arsenite: a possible mechanism of its comutagenesis. *Mol Toxicol.* 2 (1):1-9.

- Li, J. H., and T. G. Rossman. 1991. Comutagenesis of sodium arsenite with ultraviolet radiation in Chinese hamster V79 cells. *Biol Met.* 4 (4):197-200.
- Liggett, T. E., A. A. Melnikov, J. R. Marks, and V. V. Levenson. 2011. Methylation patterns in cell-free plasma DNA reflect removal of the primary tumor and drug treatment of breast cancer patients. *Int J Cancer.* 128 (2):492-9. doi:10.1002/ijc.25363.
- Lin, P. H., C. H. Lin, C. C. Huang, J. P. Fang, and M. C. Chuang. 2008. 2,3,7,8-Tetrachlorodibenzo-p-dioxin modulates the induction of DNA strand breaks and poly(ADP-ribose) polymerase-1 activation by 17beta-estradiol in human breast carcinoma cells through alteration of CYP1A1 and CYP1B1 expression. *Chem Res Toxicol.* 21 (7):1337-47. doi:10.1021/tx700396d.
- Littlefield, L. G., and E. E. Joiner. 1986. Analysis of chromosome aberrations in lymphocytes of long-term heavy smokers. *Mutat Res.* 170 (3):145-50.
- Liu, F., J. K. Killian, M. Yang, R. L. Walker, J. A. Hong, M. Zhang, et al. 2010. Epigenomic alterations and gene expression profiles in respiratory epithelia exposed to cigarette smoke condensate. *Oncogene.* 29 (25):3650-64. doi:10.1038/onc.2010.129.
- Liu, L., P. Zou, L. Zheng, L. E. Linarelli, S. Amarell, A. Passaro, et al. 2015. Tamoxifen reduces fat mass by boosting reactive oxygen species. *Cell Death Dis.* 6:e1586. doi:10.1038/cddis.2014.553.
- Lu, Y. W., Y. D. Ren, J. Bai, and W. N. Chen. 2008. The spliced variant of hepatitis B virus protein, HBSP, interacts with Bcl-2/Bcl-xl in vitro and induces apoptosis in HepG2 cells. *IUBMB Life.* 60 (10):700-2. doi:10.1002/iub.108.
- Lu, Y. W., T. L. Tan, V. Chan, and W. N. Chen. 2006. The HBSP gene is expressed during HBV replication, and its coded BH3-containing spliced viral protein induces apoptosis in HepG2 cells. *Biochem Biophys Res Commun.* 351 (1):64-70. doi:10.1016/j.bbrc.2006.10.002.
- Luo, L. Z., K. M. Werner, S. M. Gollin, and W. S. Saunders. 2004. Cigarette smoke induces anaphase bridges and genomic imbalances in normal cells. *Mutat Res.* 554 (1-2):375-85. doi:10.1016/j.mrfmmm.2004.06.031.
- Luster, M. I., and P. P. Simeonova. 2004. Arsenic and urinary bladder cell proliferation. *Toxicol Appl Pharmacol.* 198 (3):419-23. doi:10.1016/j.taap.2003.07.017.
- Madden, C. R., and B. L. Slagle. 2001. Stimulation of cellular proliferation by hepatitis B virus X protein. *Dis Markers.* 17 (3):153-7. doi:10.1155/2001/571254.
- Mahata, J., M. Chaki, P. Ghosh, L. K. Das, K. Baidya, K. Ray, et al. 2004. Chromosomal aberrations in arsenic-exposed human populations: a review with special reference to a

- comprehensive study in West Bengal, India. *Cytogenet Genome Res.* 104 (1-4):359-64. doi:10.1159/000077516.
- Manikkam, M., C. Guerrero-Bosagna, R. Tracey, M. M. Haque, and M. K. Skinner. 2012a. Transgenerational actions of environmental compounds on reproductive disease and identification of epigenetic biomarkers of ancestral exposures. *PLoS One.* 7 (2):e31901. doi:10.1371/journal.pone.0031901.
- Manikkam, M., R. Tracey, C. Guerrero-Bosagna, and M. K. Skinner. 2012b. Dioxin (TCDD) induces epigenetic transgenerational inheritance of adult onset disease and sperm epimutations. *PLoS One.* 7 (9):e46249. doi:10.1371/journal.pone.0046249.
- Marchetti, F., A. Rowan-Carroll, A. Williams, A. Polyzos, M. L. Berndt-Weis, and C. L. Yauk. 2011. Sidestream tobacco smoke is a male germ cell mutagen. *Proc Natl Acad Sci U S A.* 108 (31):12811-4. doi:10.1073/pnas.1106896108.
- Maronpot, R. R., J. F. Foley, K. Takahashi, T. Goldsworthy, G. Clark, A. Tritscher, et al. 1993. Dose response for TCDD promotion of hepatocarcinogenesis in rats initiated with DEN: histologic, biochemical, and cell proliferation endpoints. *Environ Health Perspect.* 101 (7):634-42. doi:10.1289/ehp.93101634.
- Marquez-Bravo, L. G., and J. F. Gierthy. 2008. Differential expression of estrogen receptor alpha (ERalpha) protein in MCF-7 breast cancer cells chronically exposed to TCDD. *J Cell Biochem.* 103 (2):636-47. doi:10.1002/jcb.21438.
- Marsit, C. J., K. Eddy, and K. T. Kelsey. 2006. MicroRNA responses to cellular stress. *Cancer Res.* 66 (22):10843-8. doi:10.1158/0008-5472.Can-06-1894.
- Matsubara, K., and T. Tokino. 1990. Integration of hepatitis B virus DNA and its implications for hepatocarcinogenesis. *Mol Biol Med.* 7 (3):243-60.
- McClure, E. A., C. M. North, N. E. Kaminski, and J. I. Goodman. 2011. Changes in DNA methylation and gene expression during 2,3,7,8-tetrachlorodibenzo-p-dioxin-induced suppression of the lipopolysaccharide-stimulated IgM response in splenocytes. *Toxicol Sci.* 120 (2):339-48. doi:10.1093/toxsci/kfq396.
- Meek, M. D., and G. L. Finch. 1999. Diluted mainstream cigarette smoke condensates activate estrogen receptor and aryl hydrocarbon receptor-mediated gene transcription. *Environ Res.* 80 (1):9-17. doi:10.1006/enrs.1998.3872.
- Micka, J., A. Milatovich, A. Menon, G. A. Grabowski, A. Puga, and D. W. Nebert. 1997. Human Ah receptor (AHR) gene: localization to 7p15 and suggestive correlation of polymorphism with CYP1A1 inducibility. *Pharmacogenetics.* 7 (2):95-101.
- Milara, J., and J. Cortijo. 2012. Tobacco, inflammation, and respiratory tract cancer. *Curr Pharm Des.* 18 (26):3901-38.



- Mohapatra, P., R. Preet, D. Das, S. R. Satapathy, S. Siddharth, T. Choudhuri, et al. 2014. The contribution of heavy metals in cigarette smoke condensate to malignant transformation of breast epithelial cells and in vivo initiation of neoplasia through induction of a PI3K-AKT-NFkappaB cascade. *Toxicol Appl Pharmacol.* 274 (1):168-79. doi:10.1016/j.taap.2013.09.028.
- Morales-Hernandez, A., F. J. Sanchez-Martin, M. P. Hortigon-Vinagre, F. Henao, and J. M. Merino. 2012. 2,3,7,8-Tetrachlorodibenzo-p-dioxin induces apoptosis by disruption of intracellular calcium homeostasis in human neuronal cell line SHSY5Y. *Apoptosis.* 17 (11):1170-81. doi:10.1007/s10495-012-0760-z.
- Mouret, S., C. Baudouin, M. Charveron, A. Favier, J. Cadet, and T. Douki. 2006. Cyclobutane pyrimidine dimers are predominant DNA lesions in whole human skin exposed to UVA radiation. *Proc Natl Acad Sci U S A.* 103 (37):13765-70. doi:10.1073/pnas.0604213103.
- Mourits, M. J., H. Hollema, E. G. De Vries, K. A. Ten Hoor, P. H. Willemse, and A. G. Van Der Zee. 2002. Apoptosis and apoptosis-associated parameters in relation to tamoxifen exposure in postmenopausal endometrium. *Hum Pathol.* 33 (3):341-6.
- Mousa, S. A., L. O'Connor, T. G. Rossman, and E. Block. 2007. Pro-angiogenesis action of arsenic and its reversal by selenium-derived compounds. *Carcinogenesis.* 28 (5):962-7. doi:10.1093/carcin/bgl229.
- Murakami, S. 1999. Hepatitis B virus X protein: structure, function and biology. *Intervirology.* 42 (2-3):81-99. doi:10.1159/000024969.
- Mure, K., A. N. Uddin, L. C. Lopez, M. Styblo, and T. G. Rossman. 2003. Arsenite induces delayed mutagenesis and transformation in human osteosarcoma cells at extremely low concentrations. *Environ Mol Mutagen.* 41 (5):322-31. doi:10.1002/em.10164.
- Nagayama, J., M. Nagayama, and Y. Masuda. 1993. Frequency of micronuclei induced in cultured lymphocytes by highly toxic organochlorine congeners. *Fukuoka Igaku Zasshi.* 84 (5):189-94.
- Nakamura, M., Y. Ueda, M. Hayashi, H. Kato, T. Furuhashi, and A. Morita. 2013. Tobacco smoke-induced skin pigmentation is mediated by the aryl hydrocarbon receptor. *Exp Dermatol.* 22 (8):556-8. doi:10.1111/exd.12170.
- Nakayama, T., M. Kaneko, M. Kodama, and C. Nagata. 1985. Cigarette smoke induces DNA single-strand breaks in human cells. *Nature.* 314 (6010):462-4. doi:10.1038/314462a0.
- Nandakumar, V., M. Vaid, T. O. Tollefsbol, and S. K. Katiyar. 2011. Aberrant DNA hypermethylation patterns lead to transcriptional silencing of tumor suppressor genes in UVB-exposed skin and UVB-induced skin tumors of mice. *Carcinogenesis.* 32 (4):597-604. doi:10.1093/carcin/bgq282.

- Narayan, S., A. S. Jaiswal, D. Kang, P. Srivastava, G. M. Das, and C. G. Gairola. 2004. Cigarette smoke condensate-induced transformation of normal human breast epithelial cells in vitro. *Oncogene*. 23 (35):5880-9. doi:10.1038/sj.onc.1207792.
- Naundorf, H., K. Parczyk, W. Zschiesche, S. Reinecke, B. Buttner, G. J. Saul, et al. 1996. Relation of oestradiol-mediated growth stimulation with the expression of c-erbB-2 protein in xenotransplanted oestradiol-receptor-positive and -negative breast carcinomas. *J Cancer Res Clin Oncol*. 122 (1):14-20.
- Neubert, Reinhard, Ralf Stahlmann, Maria Korte, Henk Loveren, Joseph G. Vos, Georg Golor, et al. 1993. *Effects of Small Doses of Dioxin on the Immune System of Marmosets and Rats*. Vol. 685.
- Ng, S. P., and J. T. Zelikoff. 2008. The effects of prenatal exposure of mice to cigarette smoke on offspring immune parameters. *J Toxicol Environ Health A*. 71 (7):445-53. doi:10.1080/15287390701839281.
- Nishioka, T., D. Yamamoto, T. Zhu, J. Guo, S. H. Kim, and C. Y. Chen. 2011. Nicotine overrides DNA damage-induced G1/S restriction in lung cells. *PLoS One*. 6 (4):e18619. doi:10.1371/journal.pone.0018619.
- Norppa, H. 2003. Genetic susceptibility, biomarker responses, and cancer. *Mutat Res*. 544 (2-3):339-48.
- North, C. M., R. B. Crawford, H. Lu, and N. E. Kaminski. 2009. Simultaneous in vivo time course and dose response evaluation for TCDD-induced impairment of the LPS-stimulated primary IgM response. *Toxicol Sci*. 112 (1):123-32. doi:10.1093/toxsci/kfp187.
- Oh, B. K., H. Kim, H. J. Park, Y. H. Shim, J. Choi, C. Park, et al. 2007. DNA methyltransferase expression and DNA methylation in human hepatocellular carcinoma and their clinicopathological correlation. *Int J Mol Med*. 20 (1):65-73.
- Ohashi, K., M. Tsutsumi, Y. Nakajima, K. Kobitsu, H. Nakano, and Y. Konishi. 1996. Telomere changes in human hepatocellular carcinomas and hepatitis virus infected noncancerous livers. *Cancer*. 77 (8 Suppl):1747-51. doi:10.1002/(sici)1097-0142(19960415)77:8<1747::Aid-cncr50>3.0.Co;2-w.
- Ohtake, F., A. Baba, Y. Fujii-Kuriyama, and S. Kato. 2008. Intrinsic AhR function underlies cross-talk of dioxins with sex hormone signalings. *Biochem Biophys Res Commun*. 370 (4):541-6. doi:10.1016/j.bbrc.2008.03.054.
- Oikawa, K., T. Ohbayashi, J. Mimura, R. Iwata, A. Kameta, K. Evine, et al. 2001a. Dioxin suppresses the checkpoint protein, MAD2, by an aryl hydrocarbon receptor-independent pathway. *Cancer Res*. 61 (15):5707-9.

- Oikawa, S., S. Tada-Oikawa, and S. Kawanishi. 2001b. Site-specific DNA damage at the GGG sequence by UVA involves acceleration of telomere shortening. *Biochemistry*. 40 (15):4763-8. doi:10.1021/bi002721g.
- Ovando, B. J., C. M. Vezina, B. P. McGarrigle, and J. R. Olson. 2006. Hepatic gene downregulation following acute and subchronic exposure to 2,3,7,8-tetrachlorodibenzo-p-dioxin. *Toxicol Sci*. 94 (2):428-38. doi:10.1093/toxsci/kfl111.
- Oya-Ohta, Y., T. Kaise, and T. Ochi. 1996. Induction of chromosomal aberrations in cultured human fibroblasts by inorganic and organic arsenic compounds and the different roles of glutathione in such induction. *Mutat Res*. 357 (1-2):123-9.
- Pachlopnik Schmid, J. M., C. E. Kuehni, M. P. Strippoli, H. L. Roiha, R. Pavlovic, P. Latzin, et al. 2007. Maternal tobacco smoking and decreased leukocytes, including dendritic cells, in neonates. *Pediatr Res*. 61 (4):462-6. doi:10.1203/pdr.0b013e3180332d02.
- Park, I. Y., B. H. Sohn, E. Yu, D. J. Suh, Y. H. Chung, J. H. Lee, et al. 2007. Aberrant epigenetic modifications in hepatocarcinogenesis induced by hepatitis B virus X protein. *Gastroenterology*. 132 (4):1476-94. doi:10.1053/j.gastro.2007.01.034.
- Park, S. J., W. K. Yoon, H. J. Kim, H. Y. Son, S. W. Cho, K. S. Jeong, et al. 2005. 2,3,7,8-Tetrachlorodibenzo-p-dioxin activates ERK and p38 mitogen-activated protein kinases in RAW 264.7 cells. *Anticancer Res*. 25 (4):2831-6.
- Paterlini-Brechot, P., K. Saigo, Y. Murakami, M. Chami, D. Gozuacik, C. Mugnier, et al. 2003. Hepatitis B virus-related insertional mutagenesis occurs frequently in human liver cancers and recurrently targets human telomerase gene. *Oncogene*. 22 (25):3911-6. doi:10.1038/sj.onc.1206492.
- Patlolla, A. K., T. I. Todorov, P. B. Tchounwou, G. van der Voet, and J. A. Centeno. 2012. Arsenic-induced biochemical and genotoxic effects and distribution in tissues of Sprague-Dawley rats. *Microchem J*. 105:101-107. doi:10.1016/j.microc.2012.08.013.
- Pavanello, S., P. Simioli, S. Lupi, P. Gregorio, and E. Clonfero. 2002. Exposure levels and cytochrome P450 1A2 activity, but not N-acetyltransferase, glutathione S-transferase (GST) M1 and T1, influence urinary mutagen excretion in smokers. *Cancer Epidemiol Biomarkers Prev*. 11 (10 Pt 1):998-1003.
- Peng, T. L., J. Chen, W. Mao, X. Song, and M. H. Chen. 2009. Aryl hydrocarbon receptor pathway activation enhances gastric cancer cell invasiveness likely through a c-Jun-dependent induction of matrix metalloproteinase-9. *BMC Cell Biol*. 10:27. doi:10.1186/1471-2121-10-27.
- Peng, Z., Y. Zhang, W. Gu, Z. Wang, D. Li, F. Zhang, et al. 2005. Integration of the hepatitis B virus X fragment in hepatocellular carcinoma and its effects on the expression of multiple molecules: a key to the cell cycle and apoptosis. *Int J Oncol*. 26 (2):467-73.

- Perera, F. P., R. M. Santella, D. Brenner, M. C. Poirier, A. A. Munshi, H. K. Fischman, et al. 1987. DNA adducts, protein adducts, and sister chromatid exchange in cigarette smokers and nonsmokers. *J Natl Cancer Inst.* 79 (3):449-56.
- Perucatti, A., G. P. Di Meo, S. Albarella, F. Ciotola, D. Incarnato, A. C. Jambrenghi, et al. 2006. Increased frequencies of both chromosome abnormalities and SCEs in two sheep flocks exposed to high dioxin levels during pasturage. *Mutagenesis.* 21 (1):67-75. doi:10.1093/mutage/gei076.
- Pfeifer, G. P., M. F. Denissenko, M. Olivier, N. Tretyakova, S. S. Hecht, and P. Hainaut. 2002. Tobacco smoke carcinogens, DNA damage and p53 mutations in smoking-associated cancers. *Oncogene.* 21 (48):7435-51. doi:10.1038/sj.onc.1205803.
- Pfeifer, G. P., Y. H. You, and A. Besaratinia. 2005. Mutations induced by ultraviolet light. *Mutat Res.* 571 (1-2):19-31. doi:10.1016/j.mrfmmm.2004.06.057.
- Phillipson, R. P., S. E. Tobi, J. A. Morris, and T. J. McMillan. 2002. UV-A induces persistent genomic instability in human keratinocytes through an oxidative stress mechanism. *Free Radic Biol Med.* 32 (5):474-80.
- Pi, J., Y. He, C. Bortner, J. Huang, J. Liu, T. Zhou, et al. 2005. Low level, long-term inorganic arsenite exposure causes generalized resistance to apoptosis in cultured human keratinocytes: potential role in skin co-carcinogenesis. *Int J Cancer.* 116 (1):20-6. doi:10.1002/ijc.20990.
- Piyathilake, C. J., M. Macaluso, R. J. Hine, D. W. Vinter, E. W. Richards, and C. L. Krumdieck. 1995. Cigarette smoking, intracellular vitamin deficiency, and occurrence of micronuclei in epithelial cells of the buccal mucosa. *Cancer Epidemiol Biomarkers Prev.* 4 (7):751-8.
- Pogribny, I. P., V. P. Tryndyak, A. Boyko, R. Rodriguez-Juarez, F. A. Beland, and O. Kovalchuk. 2007. Induction of microRNAome deregulation in rat liver by long-term tamoxifen exposure. *Mutat Res.* 619 (1-2):30-7. doi:10.1016/j.mrfmmm.2006.12.006.
- Pole, J. C., L. I. Gold, T. Orton, R. Huby, and P. L. Carmichael. 2005. Gene expression changes induced by estrogen and selective estrogen receptor modulators in primary-cultured human endometrial cells: signals that distinguish the human carcinogen tamoxifen. *Toxicology.* 206 (1):91-109. doi:10.1016/j.tox.2004.07.005.
- Pollicino, T., L. Belloni, G. Raffa, N. Pediconi, G. Squadrito, G. Raimondo, et al. 2006. Hepatitis B virus replication is regulated by the acetylation status of hepatitis B virus cccDNA-bound H3 and H4 histones. *Gastroenterology.* 130 (3):823-37. doi:10.1053/j.gastro.2006.01.001.

- Prescott, S. L. 2008. Effects of early cigarette smoke exposure on early immune development and respiratory disease. *Paediatr Respir Rev.* 9 (1):3-9; quiz 10. doi:10.1016/j.prrv.2007.11.004.
- Proia, N. K., G. M. Paszkiewicz, M. A. Nasca, G. E. Franke, and J. L. Pauly. 2006. Smoking and smokeless tobacco-associated human buccal cell mutations and their association with oral cancer--a review. *Cancer Epidemiol Biomarkers Prev.* 15 (6):1061-77. doi:10.1158/1055-9965.Epi-05-0983.
- Puebla-Osorio, N., K. S. Ramos, M. H. Falahatpisheh, R. Smith, 3rd, and L. R. Berghman. 2004. 2,3,7,8-Tetrachlorodibenzo-p-dioxin elicits aryl hydrocarbon receptor-mediated apoptosis in the avian DT40 pre-B-cell line through activation of caspases 9 and 3. *Comp Biochem Physiol C Toxicol Pharmacol.* 138 (4):461-8. doi:10.1016/j.cca.2004.08.002.
- Qadri, I., J. W. Conaway, R. C. Conaway, J. Schaack, and A. Siddiqui. 1996. Hepatitis B virus transactivator protein, HBx, associates with the components of TFIIH and stimulates the DNA helicase activity of TFIIH. *Proc Natl Acad Sci U S A.* 93 (20):10578-83. doi:10.1073/pnas.93.20.10578.
- Rainey, R. P., I. G. Gillman, X. Shi, T. Cheng, A. Stinson, D. Gietl, et al. 2009. Fluorescent detection of lipid peroxidation derived protein adducts upon in-vitro cigarette smoke exposure. *Toxicol Mech Methods.* 19 (6-7):401-9. doi:10.1080/15376510903104224.
- Randerath, K., K. L. Putman, E. Randerath, G. Mason, M. Kelley, and S. Safe. 1988. Organ-specific effects of long term feeding of 2,3,7,8-tetrachlorodibenzo-p-dioxin and 1,2,3,7,8-pentachlorodibenzo-p-dioxin on I-compounds in hepatic and renal DNA of female Sprague-Dawley rats. *Carcinogenesis.* 9 (12):2285-9. doi:10.1093/carcin/9.12.2285.
- Randerath, K., K. L. Putman, E. Randerath, T. Zacharewski, M. Harris, and S. Safe. 1990. Effects of 2,3,7,8-tetrachlorodibenzo-p-dioxin on I-compounds in hepatic DNA of Sprague-Dawley rats: sex-specific effects and structure-activity relationships. *Toxicol Appl Pharmacol.* 103 (2):271-80.
- Rasmussen, R. E., M. Hammer-Wilson, and M. W. Berns. 1989. Mutation and sister chromatid exchange induction in Chinese hamster ovary (CHO) cells by pulsed excimer laser radiation at 193 nm and 308 nm and continuous UV radiation at 254 nm. *Photochem Photobiol.* 49 (4):413-8.
- Rass, K., and J. Reichrath. 2008. UV damage and DNA repair in malignant melanoma and nonmelanoma skin cancer. *Adv Exp Med Biol.* 624:162-78. doi:10.1007/978-0-387-77574-6\_13.
- Rawat, S., A. J. Clippinger, and M. J. Bouchard. 2012. Modulation of apoptotic signaling by the hepatitis B virus X protein. *Viruses.* 4 (11):2945-72. doi:10.3390/v4112945.

- Ray, S. S., and H. I. Swanson. 2004. Dioxin-induced immortalization of normal human keratinocytes and silencing of p53 and p16INK4a. *J Biol Chem.* 279 (26):27187-93. doi:10.1074/jbc.M402771200.
- Reddel, R. R., L. C. Murphy, R. E. Hall, and R. L. Sutherland. 1985. Differential sensitivity of human breast cancer cell lines to the growth-inhibitory effects of tamoxifen. *Cancer Res.* 45 (4):1525-31.
- Reynolds, S. H., and M. W. Anderson. 1991. Activation of proto-oncogenes in human and mouse lung tumors. *Environ Health Perspect.* 93:145-8. doi:10.1289/ehp.9193145.
- Ridley, A. J., J. R. Whiteside, T. J. McMillan, and S. L. Allinson. 2009. Cellular and sub-cellular responses to UVA in relation to carcinogenesis. *Int J Radiat Biol.* 85 (3):177-95. doi:10.1080/09553000902740150.
- Rizki, M., E. Kossatz, A. Velazquez, A. Creus, M. Farina, S. Fortaner, et al. 2006. Metabolism of arsenic in *Drosophila melanogaster* and the genotoxicity of dimethylarsinic acid in the *Drosophila* wing spot test. *Environ Mol Mutagen.* 47 (3):162-8. doi:10.1002/em.20178.
- Robert, C., B. Muel, A. Benoit, L. Dubertret, A. Sarasin, and A. Sary. 1996. Cell survival and shuttle vector mutagenesis induced by ultraviolet A and ultraviolet B radiation in a human cell line. *J Invest Dermatol.* 106 (4):721-8.
- Rochette, P. J., S. Lacoste, J. P. Therrien, N. Bastien, D. E. Brash, and R. Drouin. 2009. Influence of cytosine methylation on ultraviolet-induced cyclobutane pyrimidine dimer formation in genomic DNA. *Mutat Res.* 665 (1-2):7-13. doi:10.1016/j.mrfmmm.2009.02.008.
- Rochette, P. J., J. P. Therrien, R. Drouin, D. Perdiz, N. Bastien, E. A. Drobetsky, et al. 2003. UVA-induced cyclobutane pyrimidine dimers form predominantly at thymine-thymine dipyrimidines and correlate with the mutation spectrum in rodent cells. *Nucleic Acids Res.* 31 (11):2786-94. doi:10.1093/nar/gkg402.
- Rodrigues-Junior, D. M., A. A. Melo, B. B. da Silva, and P. V. Lopes-Costa. 2012. Formation of DNA strand breaks in peripheral lymphocytes of rats after exposure to natural sunlight. *Biomed Environ Sci.* 25 (2):245-9. doi:10.3967/0895-3988.2012.02.018.
- Rogers, A. M., M. E. Andersen, and K. C. Back. 1982. Mutagenicity of 2,3,7,8-tetrachlorodibenzo-p-dioxin and perfluoro-n-decanoic acid in L5178Y mouse-lymphoma cells. *Mutat Res.* 105 (6):445-9.
- Sajadimajd, S., R. Yazdanparast, and F. Roshanzamir. 2016. Augmentation of oxidative stress-induced apoptosis in MCF7 cells by ascorbate-tamoxifen and/or ascorbate-juglone treatments. *In Vitro Cell Dev Biol Anim.* 52 (2):193-203. doi:10.1007/s11626-015-9961-4.

- Salama, S. A., S. Z. Abdel-Rahman, C. H. Sierra-Torres, F. A. Hamada, and W. W. Au. 1999. Role of polymorphic GSTM1 and GSTT1 genotypes on NNK-induced genotoxicity. *Pharmacogenetics*. 9 (6):735-43.
- Saletta, F., G. Matullo, M. Manuguerra, S. Arena, A. Bardelli, and P. Vineis. 2007. Exposure to the tobacco smoke constituent 4-aminobiphenyl induces chromosomal instability in human cancer cells. *Cancer Res.* 67 (15):7088-94. doi:10.1158/0008-5472.Can-06-4420.
- Sanchez-Martin, F. J., P. M. Fernandez-Salguero, and J. M. Merino. 2011. Aryl hydrocarbon receptor-dependent induction of apoptosis by 2,3,7,8-tetrachlorodibenzo-p-dioxin in cerebellar granule cells from mouse. *J Neurochem.* 118 (1):153-62. doi:10.1111/j.1471-4159.2011.07291.x.
- Sardas, S., S. Gok, and A. E. Karakaya. 1991. Increased frequency of sister chromatid exchanges in the peripheral lymphocytes of cigarette smokers. *Toxicol In Vitro*. 5 (3):263-5.
- Savage, S. M., L. A. Donaldson, S. Cherian, R. Chilukuri, V. A. White, and M. L. Sopori. 1991. Effects of cigarette smoke on the immune response. II. Chronic exposure to cigarette smoke inhibits surface immunoglobulin-mediated responses in B cells. *Toxicol Appl Pharmacol.* 111 (3):523-9.
- Schiestl, R. H., J. Aubrecht, W. Y. Yap, S. Kandikonda, and S. Sidhom. 1997. Polychlorinated biphenyls and 2,3,7,8-tetrachlorodibenzo-p-dioxin induce intrachromosomal recombination in vitro and in vivo. *Cancer Res.* 57 (19):4378-83.
- Schluter, V., M. Meyer, P. H. Hofschneider, R. Koshy, and W. H. Caselmann. 1994. Integrated hepatitis B virus X and 3' truncated preS/S sequences derived from human hepatomas encode functionally active transactivators. *Oncogene*. 9 (11):3335-44.
- Schuller, H. M., P. K. Tithof, M. Williams, and H. Plummer, 3rd. 1999. The tobacco-specific carcinogen 4-(methylnitrosamino)-1-(3-pyridyl)-1-butanone is a beta-adrenergic agonist and stimulates DNA synthesis in lung adenocarcinoma via beta-adrenergic receptor-mediated release of arachidonic acid. *Cancer Res.* 59 (18):4510-5.
- Schwerdtle, T., I. Walter, I. Mackiw, and A. Hartwig. 2003. Induction of oxidative DNA damage by arsenite and its trivalent and pentavalent methylated metabolites in cultured human cells and isolated DNA. *Carcinogenesis*. 24 (5):967-74. doi:10.1093/carcin/bgg018.
- Sciandrello, G., R. Barbaro, F. Caradonna, and G. Barbata. 2002. Early induction of genetic instability and apoptosis by arsenic in cultured Chinese hamster cells. *Mutagenesis*. 17 (2):99-103. doi:10.1093/mutage/17.2.99.

- Sciandrello, G., F. Caradonna, M. Mauro, and G. Barbata. 2004. Arsenic-induced DNA hypomethylation affects chromosomal instability in mammalian cells. *Carcinogenesis*. 25 (3):413-7. doi:10.1093/carcin/bgh029.
- Scott, G. A., T. S. Laughlin, and P. G. Rothberg. 2014. Mutations of the TERT promoter are common in basal cell carcinoma and squamous cell carcinoma. *Mod Pathol*. 27 (4):516-23. doi:10.1038/modpathol.2013.167.
- Sen, B., B. Mahadevan, and D. M. DeMarini. 2007. Transcriptional responses to complex mixtures: a review. *Mutat Res*. 636 (1-3):144-77. doi:10.1016/j.mrrev.2007.08.002.
- Seo, J. Y., E. K. Kim, S. H. Lee, K. C. Park, K. H. Kim, H. C. Eun, et al. 2003. Enhanced expression of cyclooxygenase-2 by UV in aged human skin in vivo. *Mech Ageing Dev*. 124 (8-9):903-10.
- Severi, T., C. Ying, J. R. Vermeesch, D. Cassiman, L. Cnops, C. Verslype, et al. 2006. Hepatitis B virus replication causes oxidative stress in HepAD38 liver cells. *Mol Cell Biochem*. 290 (1-2):79-85. doi:10.1007/s11010-006-9167-x.
- Shang, Y. 2006. Molecular mechanisms of oestrogen and SERMs in endometrial carcinogenesis. *Nat Rev Cancer*. 6 (5):360-8. doi:10.1038/nrc1879.
- Shen, S., J. Lee, M. Weinfeld, and X. C. Le. 2008. Attenuation of DNA damage-induced p53 expression by arsenic: a possible mechanism for arsenic co-carcinogenesis. *Mol Carcinog*. 47 (7):508-18. doi:10.1002/mc.20406.
- Shertzer, H. G., D. W. Nebert, A. Puga, M. Ary, D. Sonntag, K. Dixon, et al. 1998. Dioxin causes a sustained oxidative stress response in the mouse. *Biochem Biophys Res Commun*. 253 (1):44-8. doi:10.1006/bbrc.1998.9753.
- Shibutani, S., N. Suzuki, I. Terashima, S. M. Sugarman, A. P. Grollman, and M. L. Pearl. 1999. Tamoxifen-DNA adducts detected in the endometrium of women treated with tamoxifen. *Chem Res Toxicol*. 12 (7):646-53. doi:10.1021/tx990033w.
- Shon, J. K., B. H. Shon, I. Y. Park, S. U. Lee, L. Fa, K. Y. Chang, et al. 2009. Hepatitis B virus-X protein recruits histone deacetylase 1 to repress insulin-like growth factor binding protein 3 transcription. *Virus Res*. 139 (1):14-21. doi:10.1016/j.virusres.2008.09.006.
- Simon, D., T. London, H. W. Hann, and B. B. Knowles. 1991. Chromosome abnormalities in peripheral blood cells of hepatitis B virus chronic carriers. *Cancer Res*. 51 (22):6176-9.
- Singh, N. P., U. P. Singh, B. Singh, R. L. Price, M. Nagarkatti, and P. S. Nagarkatti. 2011. Activation of aryl hydrocarbon receptor (AhR) leads to reciprocal epigenetic regulation of FoxP3 and IL-17 expression and amelioration of experimental colitis. *PLoS One*. 6 (8):e23522. doi:10.1371/journal.pone.0023522.



- Sinha, D., M. Roy, M. Siddiqi, and R. K. Bhattacharya. 2005. Arsenic-induced micronuclei formation in mammalian cells and its counteraction by tea. *J Environ Pathol Toxicol Oncol.* 24 (1):45-56.
- Slattery, M. L., K. Curtin, K. Anderson, K. N. Ma, L. Ballard, S. Edwards, et al. 2000. Associations between cigarette smoking, lifestyle factors, and microsatellite instability in colon tumors. *J Natl Cancer Inst.* 92 (22):1831-6. doi:10.1093/jnci/92.22.1831.
- Smith, C. J., T. A. Perfetti, and J. A. King. 2006. Perspectives on pulmonary inflammation and lung cancer risk in cigarette smokers. *Inhal Toxicol.* 18 (9):667-77. doi:10.1080/08958370600742821.
- Snow, E. T., P. Sykora, T. R. Durham, and C. B. Klein. 2005. Arsenic, mode of action at biologically plausible low doses: what are the implications for low dose cancer risk? *Toxicol Appl Pharmacol.* 207 (2 Suppl):557-64. doi:10.1016/j.taap.2005.01.048.
- Son, D. S., and K. K. Rozman. 2002. 2,3,7,8-Tetrachlorodibenzo-p-dioxin (TCDD) induces plasminogen activator inhibitor-1 through an aryl hydrocarbon receptor-mediated pathway in mouse hepatoma cell lines. *Arch Toxicol.* 76 (7):404-13. doi:10.1007/s00204-002-0354-6.
- Sonmez, M., G. Turk, A. O. Ceribasi, F. Sakin, and A. Atessahin. 2011. Attenuating effect of lycopene and ellagic acid on 2,3,7,8-tetrachlorodibenzo-p-dioxin-induced spermiotoxicity and testicular apoptosis. *Drug Chem Toxicol.* 34 (4):347-56. doi:10.3109/01480545.2011.557382.
- Sopori, M. L., S. Cherian, R. Chilukuri, and G. M. Shopp. 1989. Cigarette smoke causes inhibition of the immune response to intratracheally administered antigens. *Toxicol Appl Pharmacol.* 97 (3):489-99.
- States, J. C., S. Srivastava, Y. Chen, and A. Barchowsky. 2009. Arsenic and cardiovascular disease. *Toxicol Sci.* 107 (2):312-23. doi:10.1093/toxsci/kfn236.
- Stavrides, J. C. 2006. Lung carcinogenesis: pivotal role of metals in tobacco smoke. *Free Radic Biol Med.* 41 (7):1017-30. doi:10.1016/j.freeradbiomed.2006.06.024.
- Straub, A. C., D. B. Stolz, H. Vin, M. A. Ross, N. V. Soucy, L. R. Klei, et al. 2007. Low level arsenic promotes progressive inflammatory angiogenesis and liver blood vessel remodeling in mice. *Toxicol Appl Pharmacol.* 222 (3):327-36. doi:10.1016/j.taap.2006.10.011.
- Styles, J. A., A. Davies, R. Davies, I. N. White, and L. L. Smith. 1997. Clastogenic and aneugenic effects of tamoxifen and some of its analogues in hepatocytes from dosed rats and in human lymphoblastoid cells transfected with human P450 cDNAs (MCL-5 cells). *Carcinogenesis.* 18 (2):303-13. doi:10.1093/carcin/18.2.303.

- Su, P. F., T. C. Lee, P. J. Lin, P. H. Lee, Y. M. Jeng, C. H. Chen, et al. 2007. Differential DNA methylation associated with hepatitis B virus infection in hepatocellular carcinoma. *Int J Cancer*. 121 (6):1257-64. doi:10.1002/ijc.22849.
- Sundar, I. K., M. Z. Nevid, A. E. Friedman, and I. Rahman. 2014. Cigarette smoke induces distinct histone modifications in lung cells: implications for the pathogenesis of COPD and lung cancer. *J Proteome Res*. 13 (2):982-96. doi:10.1021/pr400998n.
- Syed, D. N., M. I. Khan, M. Shabbir, and H. Mukhtar. 2013. MicroRNAs in skin response to UV radiation. *Curr Drug Targets*. 14 (10):1128-34.
- Syed, D. N., R. K. Lall, and H. Mukhtar. 2015. MicroRNAs and photocarcinogenesis. *Photochem Photobiol*. 91 (1):173-87. doi:10.1111/php.12346.
- Takada, S., N. Kaneniwa, N. Tsuchida, and K. Koike. 1997. Cytoplasmic retention of the p53 tumor suppressor gene product is observed in the hepatitis B virus X gene-transfected cells. *Oncogene*. 15 (16):1895-901. doi:10.1038/sj.onc.1201369.
- Takahashi, M., J. C. Barrett, and T. Tsutsui. 2002. Transformation by inorganic arsenic compounds of normal Syrian hamster embryo cells into a neoplastic state in which they become anchorage-independent and cause tumors in newborn hamsters. *Int J Cancer*. 99 (5):629-34. doi:10.1002/ijc.10407.
- Takeuchi, A., M. Takeuchi, K. Oikawa, K. H. Sonoda, Y. Usui, Y. Okunuki, et al. 2009. Effects of dioxin on vascular endothelial growth factor (VEGF) production in the retina associated with choroidal neovascularization. *Invest Ophthalmol Vis Sci*. 50 (7):3410-6. doi:10.1167/iovs.08-2299.
- Tan, W., T. Y. Wong, Y. Wang, J. Huang, and L. K. Leung. 2013. CYP19 expression is induced by 2,3,7,8-tetrachloro-dibenzo-para-dioxin in human glioma cells. *Mol Cell Endocrinol*. 375 (1-2):106-12. doi:10.1016/j.mce.2013.05.018.
- Tanaka, J., J. Yonemoto, H. Zaha, R. Kiyama, and H. Sone. 2007. Estrogen-responsive genes newly found to be modified by TCDD exposure in human cell lines and mouse systems. *Mol Cell Endocrinol*. 272 (1-2):38-49. doi:10.1016/j.mce.2007.04.008.
- Tanaka-Kagawa, T., N. Hanioka, H. Yoshida, H. Jinno, and M. Ando. 2003. Arsenite and arsenate activate extracellular signal-regulated kinases 1/2 by an epidermal growth factor receptor-mediated pathway in normal human keratinocytes. *Br J Dermatol*. 149 (6):1116-27.
- Tenchini, M. L., C. Crimando, G. Pacchetti, A. Mottura, S. Agosti, and L. De Carli. 1983. A comparative cytogenetic study on cases of induced abortions in TCDD-exposed and nonexposed women. *Environ Mutagen*. 5 (1):73-85.

- Teraoka, H., A. Ogawa, A. Kubota, J. J. Stegeman, R. E. Peterson, and T. Hiraga. 2010. Malformation of certain brain blood vessels caused by TCDD activation of Ahr2/Arnt1 signaling in developing zebrafish. *Aquat Toxicol.* 99 (2):241-7. doi:10.1016/j.aquatox.2010.05.003.
- Terradillos, O., T. Pollicino, H. Lecoeur, M. Tripodi, M. L. Gougeon, P. Tiollais, et al. 1998. p53-independent apoptotic effects of the hepatitis B virus HBx protein in vivo and in vitro. *Oncogene.* 17 (16):2115-23. doi:10.1038/sj.onc.1202432.
- Tezuka, M., K. Hanioka, K. Yamanaka, and S. Okada. 1993. Gene damage induced in human alveolar type II (L-132) cells by exposure to dimethylarsinic acid. *Biochem Biophys Res Commun.* 191 (3):1178-83. doi:10.1006/bbrc.1993.1341.
- Thatcher, T. H., R. P. Benson, R. P. Phipps, and P. J. Sime. 2008. High-dose but not low-dose mainstream cigarette smoke suppresses allergic airway inflammation by inhibiting T cell function. *Am J Physiol Lung Cell Mol Physiol.* 295 (3):L412-21. doi:10.1152/ajplung.00392.2007.
- Tonn, T., C. Esser, E. M. Schneider, W. Steinmann-Steiner-Haldenstatt, and E. Gleichmann. 1996. Persistence of decreased T-helper cell function in industrial workers 20 years after exposure to 2,3,7,8-tetrachlorodibenzo-p-dioxin. *Environ Health Perspect.* 104 (4):422-6. doi:10.1289/ehp.96104422.
- Tornqvist, M., S. Osterman-Golkar, A. Kautiainen, S. Jensen, P. B. Farmer, and L. Ehrenberg. 1986. Tissue doses of ethylene oxide in cigarette smokers determined from adduct levels in hemoglobin. *Carcinogenesis.* 7 (9):1519-21. doi:10.1093/carcin/7.9.1519.
- Toyooka, S., M. Tokumo, H. Shigematsu, K. Matsuo, H. Asano, K. Tomii, et al. 2006. Mutational and epigenetic evidence for independent pathways for lung adenocarcinomas arising in smokers and never smokers. *Cancer Res.* 66 (3):1371-5. doi:10.1158/0008-5472.Can-05-2625.
- Tralhao, J. G., J. Roudier, S. Morosan, C. Giannini, H. Tu, C. Goulenok, et al. 2002. Paracrine in vivo inhibitory effects of hepatitis B virus X protein (HBx) on liver cell proliferation: an alternative mechanism of HBx-related pathogenesis. *Proc Natl Acad Sci U S A.* 99 (10):6991-6. doi:10.1073/pnas.092657699.
- Tritscher, A. M., G. C. Clark, C. Sewall, R. C. Sills, R. Maronpot, and G. W. Lucier. 1995. Persistence of TCDD-induced hepatic cell proliferation and growth of enzyme altered foci after chronic exposure followed by cessation of treatment in DEN initiated female rats. *Carcinogenesis.* 16 (11):2807-11. doi:10.1093/carcin/16.11.2807.
- Tritscher, A. M., J. A. Goldstein, C. J. Portier, Z. McCoy, G. C. Clark, and G. W. Lucier. 1992. Dose-response relationships for chronic exposure to 2,3,7,8-tetrachlorodibenzo-p-dioxin in a rat tumor promotion model: quantification and immunolocalization of CYP1A1 and CYP1A2 in the liver. *Cancer Res.* 52 (12):3436-42.

- Tritscher, A. M., A. M. Seacat, J. D. Yager, J. D. Groopman, B. D. Miller, D. Bell, et al. 1996. Increased oxidative DNA damage in livers of 2,3,7,8-tetrachlorodibenzo-p-dioxin treated intact but not ovariectomized rats. *Cancer Lett.* 98 (2):219-25.
- Trouba, K. J., E. M. Wauson, and R. L. Vorce. 2000. Sodium arsenite-induced dysregulation of proteins involved in proliferative signaling. *Toxicol Appl Pharmacol.* 164 (2):161-70. doi:10.1006/taap.1999.8873.
- Tryndyak, V. P., L. Muskhelishvili, O. Kovalchuk, R. Rodriguez-Juarez, B. Montgomery, M. I. Churchwell, et al. 2006. Effect of long-term tamoxifen exposure on genotoxic and epigenetic changes in rat liver: implications for tamoxifen-induced hepatocarcinogenesis. *Carcinogenesis.* 27 (8):1713-20. doi:10.1093/carcin/bgl050.
- Tsang, H., T. Y. Cheung, S. P. Kodithuwakku, J. Chai, W. S. Yeung, C. K. Wong, et al. 2012. 2,3,7,8-Tetrachlorodibenzo-p-dioxin (TCDD) suppresses spheroids attachment on endometrial epithelial cells through the down-regulation of the Wnt-signaling pathway. *Reprod Toxicol.* 33 (1):60-6. doi:10.1016/j.reprotox.2011.11.002.
- Tucker, A. N., S. J. Vore, and M. I. Luster. 1986. Suppression of B cell differentiation by 2,3,7,8-tetrachlorodibenzo-p-dioxin. *Mol Pharmacol.* 29 (4):372-7.
- Turkez, H., F. Geyikoglu, Y. I. Mokhtar, and B. Togar. 2012a. Eicosapentaenoic acid protects against 2,3,7,8-tetrachlorodibenzo-p-dioxin-induced hepatic toxicity in cultured rat hepatocytes. *Cytotechnology.* 64 (1):15-25. doi:10.1007/s10616-011-9386-1.
- Turkez, H., F. Geyikoglu, and M. I. Yousef. 2012b. Modulatory effect of L-glutamine on 2,3,7,8 tetrachlorodibenzo-p-dioxin-induced liver injury in rats. *Toxicol Ind Health.* 28 (7):663-72. doi:10.1177/0748233711420474.
- Ucur, A., S. Palanduz, K. Cefle, S. Ozturk, G. Tutkan, S. Vatansever, et al. 2003. Sister chromatid exchange and mitotic index in patients with cirrhosis related to hepatitis B and C viruses and in chronic carriers. *Hepatogastroenterology.* 50 (54):2137-40.
- Umemoto, A., Y. Monden, C. X. Lin, M. Abdul-Momen, Y. Ueyama, K. Komaki, et al. 2004. Determination of tamoxifen--DNA adducts in leukocytes from breast cancer patients treated with tamoxifen. *Chem Res Toxicol.* 17 (12):1577-83. doi:10.1021/tx049930c.
- Ura, S., M. Honda, T. Yamashita, T. Ueda, H. Takatori, R. Nishino, et al. 2009. Differential microRNA expression between hepatitis B and hepatitis C leading disease progression to hepatocellular carcinoma. *Hepatology.* 49 (4):1098-112. doi:10.1002/hep.22749.
- Valencia, A., A. Rajadurai, A. B. Carle, and I. E. Kochevar. 2006. 7-Dehydrocholesterol enhances ultraviolet A-induced oxidative stress in keratinocytes: roles of NADPH oxidase, mitochondria, and lipid rafts. *Free Radic Biol Med.* 41 (11):1704-18. doi:10.1016/j.freeradbiomed.2006.09.006.

- Valic, E., O. Jahn, O. Papke, R. Winker, C. Wolf, and W. H. Rudiger. 2004. Transient increase in micronucleus frequency and DNA effects in the comet assay in two patients after intoxication with 2,3,7,8-tetrachlorodibenzo- p-dioxin. *Int Arch Occup Environ Health*. 77 (5):301-6. doi:10.1007/s00420-004-0508-3.
- van der Vaart, H., D. S. Postma, W. Timens, and N. H. ten Hacken. 2004. Acute effects of cigarette smoke on inflammation and oxidative stress: a review. *Thorax*. 59 (8):713-21. doi:10.1136/thx.2003.012468.
- van Doorn, R., N. A. Gruis, R. Willemze, P. A. van der Velden, and C. P. Tensen. 2005. Aberrant DNA methylation in cutaneous malignancies. *Semin Oncol*. 32 (5):479-87. doi:10.1053/j.seminoncol.2005.07.001.
- van Kranen, H. J., A. de Laat, J. van de Ven, P. W. Wester, A. de Vries, R. J. Berg, et al. 1997. Low incidence of p53 mutations in UVA (365-nm)-induced skin tumors in hairless mice. *Cancer Res*. 57 (7):1238-40.
- Veglia, F., S. Loft, G. Matullo, M. Peluso, A. Munnia, F. Perera, et al. 2008. DNA adducts and cancer risk in prospective studies: a pooled analysis and a meta-analysis. *Carcinogenesis*. 29 (5):932-6. doi:10.1093/carcin/bgm286.
- Verschuere, S., R. De Smet, L. Allais, and C. A. Cuvelier. 2012. The effect of smoking on intestinal inflammation: what can be learned from animal models? *J Crohns Colitis*. 6 (1):1-12. doi:10.1016/j.crohns.2011.09.006.
- Vijayalaxmi, K. K., and S. P. Rai. 1996. Studies on the genotoxicity of tamoxifen citrate in mouse bone marrow cells. *Mutat Res*. 368 (2):109-14.
- Vineis, P., and S. H. Zahm. 1988. Immunosuppressive effects of dioxin in the development of Kaposi's sarcoma and non-Hodgkin's lymphoma. *Lancet*. 1 (8575-6):55. doi:10.1016/s0140-6736(88)91032-x.
- Vivekanandan, P., H. D. Daniel, R. Kannangai, F. Martinez-Murillo, and M. Torbenson. 2010. Hepatitis B virus replication induces methylation of both host and viral DNA. *J Virol*. 84 (9):4321-9. doi:10.1128/jvi.02280-09.
- Vogt, B. L., and T. G. Rossman. 2001. Effects of arsenite on p53, p21 and cyclin D expression in normal human fibroblasts -- a possible mechanism for arsenite's comutagenicity. *Mutat Res*. 478 (1-2):159-68.
- von Stedingk, H., A. C. Vikstrom, P. Rydberg, M. Pedersen, J. K. Nielsen, D. Segerback, et al. 2011. Analysis of hemoglobin adducts from acrylamide, glycidamide, and ethylene oxide in paired mother/cord blood samples from Denmark. *Chem Res Toxicol*. 24 (11):1957-65. doi:10.1021/tx200284u.

- Wahba, Z. Z., T. A. Lawson, and S. J. Stohs. 1988. Induction of hepatic DNA single strand breaks in rats by 2,3,7,8-tetrachlorodibenzo-p-dioxin (TCDD). *Cancer Lett.* 39 (3):281-6.
- Wahba, Z. Z., T. W. Lawson, W. J. Murray, and S. J. Stohs. 1989. Factors influencing the induction of DNA single strand breaks in rats by 2,3,7,8-tetrachlorodibenzo-p-dioxin (TCDD). *Toxicology.* 58 (1):57-69.
- Wallen, M., E. Tomas, T. Visakorpi, K. Holli, and J. Maenpaa. 2005. Endometrial K-ras mutations in postmenopausal breast cancer patients treated with adjuvant tamoxifen or toremifene. *Cancer Chemother Pharmacol.* 55 (4):343-346. doi:10.1007/s00280-004-0923-x.
- Walser, T., X. Cui, J. Yanagawa, J. M. Lee, E. Heinrich, G. Lee, et al. 2008. Smoking and lung cancer: the role of inflammation. *Proc Am Thorac Soc.* 5 (8):811-5. doi:10.1513/pats.200809-100TH.
- Walter, I., T. Schwerdtle, C. Thuy, J. L. Parsons, G. L. Dianov, and A. Hartwig. 2007. Impact of arsenite and its methylated metabolites on PARP-1 activity, PARP-1 gene expression and poly(ADP-ribosyl)ation in cultured human cells. *DNA Repair (Amst).* 6 (1):61-70. doi:10.1016/j.dnarep.2006.08.008.
- Wang, L. E., P. Xiong, S. S. Strom, L. H. Goldberg, J. E. Lee, M. I. Ross, et al. 2005. In vitro sensitivity to ultraviolet B light and skin cancer risk: a case-control analysis. *J Natl Cancer Inst.* 97 (24):1822-31. doi:10.1093/jnci/dji429.
- Wang, S. L., G. W. Lucier, R. B. Everson, G. I. Sunahara, and K. T. Shiverick. 1988. Smoking-related alterations in epidermal growth factor and insulin receptors in human placenta. *Mol Pharmacol.* 34 (3):265-71.
- Wang, T. S., C. H. Chung, A. S. Wang, D. T. Bau, T. Samikkannu, K. Y. Jan, et al. 2002a. Endonuclease III, formamidopyrimidine-DNA glycosylase, and proteinase K additively enhance arsenic-induced DNA strand breaks in human cells. *Chem Res Toxicol.* 15 (10):1254-8.
- Wang, Y., J. J. Digiovanna, J. B. Stern, T. J. Hornyak, M. Raffeld, S. G. Khan, et al. 2009. Evidence of ultraviolet type mutations in xeroderma pigmentosum melanomas. *Proc Natl Acad Sci U S A.* 106 (15):6279-84. doi:10.1073/pnas.0812401106.
- Wang, Z., S. Kyo, Y. Maida, M. Takakura, M. Tanaka, N. Yatabe, et al. 2002b. Tamoxifen regulates human telomerase reverse transcriptase (hTERT) gene expression differently in breast and endometrial cancer cells. *Oncogene.* 21 (22):3517-24. doi:10.1038/sj.onc.1205463.

- West, K. A., J. Brognard, A. S. Clark, I. R. Linnoila, X. Yang, S. M. Swain, et al. 2003. Rapid Akt activation by nicotine and a tobacco carcinogen modulates the phenotype of normal human airway epithelial cells. *J Clin Invest.* 111 (1):81-90. doi:10.1172/jci16147.
- Whiteman, D. C., C. A. Whiteman, and A. C. Green. 2001. Childhood sun exposure as a risk factor for melanoma: a systematic review of epidemiologic studies. *Cancer Causes Control.* 12 (1):69-82.
- Whiteside, J. R., and T. J. McMillan. 2009. A bystander effect is induced in human cells treated with UVA radiation but not UVB radiation. *Radiat Res.* 171 (2):204-11. doi:10.1667/rr1508.1.
- Whitlock, J. P., Jr. 1999. Induction of cytochrome P4501A1. *Annu Rev Pharmacol Toxicol.* 39:103-25. doi:10.1146/annurev.pharmtox.39.1.103.
- Wikonkal, N. M., and D. E. Brash. 1999. Ultraviolet radiation induced signature mutations in photocarcinogenesis. *J Invest Dermatol Symp Proc.* 4 (1):6-10.
- Wischermann, K., S. Popp, S. Moshir, K. Scharfetter-Kochanek, M. Wlaschek, F. de Gruijl, et al. 2008. UVA radiation causes DNA strand breaks, chromosomal aberrations and tumorigenic transformation in HaCaT skin keratinocytes. *Oncogene.* 27 (31):4269-80. doi:10.1038/onc.2008.70.
- Word, B., L. E. Lyn-Cook, Jr., B. Mwamba, H. Wang, B. Lyn-Cook, and G. Hammons. 2013. Cigarette smoke condensate induces differential expression and promoter methylation profiles of critical genes involved in lung cancer in NL-20 lung cells in vitro: short-term and chronic exposure. *Int J Toxicol.* 32 (1):23-31. doi:10.1177/1091581812465902.
- Wozniak, K., A. Kolacinska, M. Blasinska-Morawiec, A. Morawiec-Bajda, Z. Morawiec, M. Zadrozny, et al. 2007. The DNA-damaging potential of tamoxifen in breast cancer and normal cells. *Arch Toxicol.* 81 (7):519-27. doi:10.1007/s00204-007-0188-3.
- Wu, F., F. J. Burns, R. Zhang, A. N. Uddin, and T. G. Rossman. 2005a. Arsenite-induced alterations of DNA photodamage repair and apoptosis after solar-simulation UVR in mouse keratinocytes in vitro. *Environ Health Perspect.* 113 (8):983-6. doi:10.1289/ehp.7846.
- Wu, H., Y. Chen, J. Liang, B. Shi, G. Wu, Y. Zhang, et al. 2005a. Hypomethylation-linked activation of PAX2 mediates tamoxifen-stimulated endometrial carcinogenesis. *Nature.* 438 (7070):981-7. doi:10.1038/nature04225.
- Wyde, M. E., V. A. Wong, A. H. Kim, G. W. Lucier, and N. J. Walker. 2001. Induction of hepatic 8-oxo-deoxyguanosine adducts by 2,3,7,8-tetrachlorodibenzo-p-dioxin in Sprague-Dawley rats is female-specific and estrogen-dependent. *Chem Res Toxicol.* 14 (7):849-55.

- Xi, S., H. Xu, J. Shan, Y. Tao, J. A. Hong, S. Inchauste, et al. 2013. Cigarette smoke mediates epigenetic repression of miR-487b during pulmonary carcinogenesis. *J Clin Invest.* 123 (3):1241-61. doi:10.1172/jci61271.
- Xu, C., W. Zhou, Y. Wang, and L. Qiao. 2014a. Hepatitis B virus-induced hepatocellular carcinoma. *Cancer Lett.* 345 (2):216-22. doi:10.1016/j.canlet.2013.08.035.
- Xu, G., Z. Duan, G. Chen, X. Nie, J. Liu, Y. Zhang, et al. 2013c. Role of mitogen-activated protein kinase cascades in 2,3,7,8-tetrachlorodibenzo-p-dioxin-induced apoptosis in neuronal pheochromocytoma cells. *Hum Exp Toxicol.* 32 (12):1278-91. doi:10.1177/0960327113482595.
- Xu, G., Y. Li, K. Yoshimoto, Q. Wu, G. Chen, T. Iwata, et al. 2014b. 2,3,7,8-Tetrachlorodibenzo-p-dioxin stimulates proliferation of HAPI microglia by affecting the Akt/GSK-3beta/cyclin D1 signaling pathway. *Toxicol Lett.* 224 (3):362-70. doi:10.1016/j.toxlet.2013.11.003.
- Xu, G., Q. Zhou, C. Wan, Y. Wang, J. Liu, Y. Li, et al. 2013d. 2,3,7,8-TCDD induces neurotoxicity and neuronal apoptosis in the rat brain cortex and PC12 cell line through the down-regulation of the Wnt/beta-catenin signaling pathway. *Neurotoxicology.* 37:63-73. doi:10.1016/j.neuro.2013.04.005.
- Xu, Y., L. Li, X. Xiang, H. Wang, W. Cai, J. Xie, et al. 2013a. Three common functional polymorphisms in microRNA encoding genes in the susceptibility to hepatocellular carcinoma: a systematic review and meta-analysis. *Gene.* 527 (2):584-93. doi:10.1016/j.gene.2013.05.085.
- Xu, Y., Y. Zhao, W. Xu, F. Luo, B. Wang, Y. Li, et al. 2013b. Involvement of HIF-2alpha-mediated inflammation in arsenite-induced transformation of human bronchial epithelial cells. *Toxicol Appl Pharmacol.* 272 (2):542-50. doi:10.1016/j.taap.2013.06.017.
- Yaghmaie, M., H. Mozdarani, K. Alimoghaddam, S. H. Ghaffari, A. Ghavamzadeh, and M. Hajhashemi. 2012. Characterization of arsenic-induced cytogenetic alterations in acute promyelocytic leukemia cell line, NB4. *Med Oncol.* 29 (2):1209-16. doi:10.1007/s12032-011-9946-4.
- Yanbaeva, D. G., M. A. Dentener, E. C. Creutzberg, G. Wesseling, and E. F. Wouters. 2007. Systemic effects of smoking. *Chest.* 131 (5):1557-66. doi:10.1378/chest.06-2179.
- Yang, C. Y., T. H. Kuo, and L. P. Ting. 2006. Human hepatitis B viral e antigen interacts with cellular interleukin-1 receptor accessory protein and triggers interleukin-1 response. *J Biol Chem.* 281 (45):34525-36. doi:10.1074/jbc.M510981200.
- Yang, J. H., and H. G. Lee. 2010. 2,3,7,8-Tetrachlorodibenzo-p-dioxin induces apoptosis of articular chondrocytes in culture. *Chemosphere.* 79 (3):278-84. doi:10.1016/j.chemosphere.2010.01.040.



- Yang, J. H., C. Vogel, and J. Abel. 1999. A malignant transformation of human cells by 2,3,7,8-tetrachlorodibenzo-p-dioxin exhibits altered expressions of growth regulatory factors. *Carcinogenesis*. 20 (1):13-8. doi:10.1093/carcin/20.1.13.
- Yih, L. H., and T. C. Lee. 1999. Effects of exposure protocols on induction of kinetochore-plus and -minus micronuclei by arsenite in diploid human fibroblasts. *Mutat Res*. 440 (1):75-82.
- Yoo, Y. G., T. Y. Na, H. W. Seo, J. K. Seong, C. K. Park, Y. K. Shin, et al. 2008. Hepatitis B virus X protein induces the expression of MTA1 and HDAC1, which enhances hypoxia signaling in hepatocellular carcinoma cells. *Oncogene*. 27 (24):3405-13. doi:10.1038/sj.onc.1211000.
- Yoshioka, W., W. Higashiyama, and C. Tohyama. 2011. Involvement of microRNAs in dioxin-induced liver damage in the mouse. *Toxicol Sci*. 122 (2):457-65. doi:10.1093/toxsci/kfr130.
- Zebboudj, A., M. A. Maroui, J. Dutrieux, C. Touil-Boukoffa, M. Bourouba, M. K. Chelbi-Alix, et al. 2014. Sodium arsenite induces apoptosis and Epstein-Barr virus reactivation in lymphoblastoid cells. *Biochimie*. 107 Pt B:247-56. doi:10.1016/j.biochi.2014.09.002.
- Zhang, G., C. N. Njauw, J. M. Park, C. Naruse, M. Asano, and H. Tsao. 2008. EphA2 is an essential mediator of UV radiation-induced apoptosis. *Cancer Res*. 68 (6):1691-6. doi:10.1158/0008-5472.Can-07-2372.
- Zhang, Z. Z., X. Liu, D. Q. Wang, M. K. Teng, L. W. Niu, A. L. Huang, et al. 2011. Hepatitis B virus and hepatocellular carcinoma at the miRNA level. *World J Gastroenterol*. 17 (28):3353-8. doi:10.3748/wjg.v17.i28.3353.
- Zhou, B. R., Y. Xu, F. Permatasari, W. L. Liu, W. Li, X. F. Guo, et al. 2012. Characterization of the miRNA profile in UVB-irradiated normal human keratinocytes. *Exp Dermatol*. 21 (4):317-9. doi:10.1111/j.1600-0625.2012.01465.x.
- Zhou, H., G. M. Calaf, and T. K. Hei. 2003. Malignant transformation of human bronchial epithelial cells with the tobacco-specific nitrosamine, 4-(methylnitrosamino)-1-(3-pyridyl)-1-butanone. *Int J Cancer*. 106 (6):821-6. doi:10.1002/ijc.11319.
- Zhou, Xue, Hong Sun, Thomas P. Ellen, Haobin Chen, and Max Costa. 2008. Arsenite alters global histone H3 methylation. *Carcinogenesis*. 29 (9):1831-1836. doi:10.1093/carcin/bgn063 Available from <https://doi.org/10.1093/carcin/bgn063>.
- Zou, N., J. Hong, and Q. Y. Dai. 2009. Passive cigarette smoking induces inflammatory injury in human arterial walls. *Chin Med J (Engl)*. 122 (4):444-8.

Zuniga-Gonzalez, G. M., B. C. Gomez-Meda, A. L. Zamora-Perez, M. A. Martinez-Gonzalez, I. A. Munoz de Haro, A. E. Perez-Navarro, et al. 2015. Micronucleated erythrocytes in newborns of rat dams exposed to ultraviolet-A light during pregnancy; protection by ascorbic acid supplementation. *Mutat Res Genet Toxicol Environ Mutagen.* 782:36-41. doi:10.1016/j.mrgentox.2015.03.013.
